# Supplementary material for: Convenient preparation of thioglycomimetics: S-glycosyl sulfenamides, sulfinamides and sulphonamides
Source: Royal Society of Chemistry journal article supplement (doi:10.1039/c7ra05339h), 2017-01-01
Supplement: c7ra05339h1.pdf [file c7ra05339h1.pdf]

## Supporting Information

### Convenient preparation of thioglycomimetics: *S*-glycosyl sulfenamides, sulfinamides and sulphonamides

Arin Guchait, Kuladip Jana and Anup Kumar Misra\*

#### Index

| Subject                                                                                          | Page No. |
|--------------------------------------------------------------------------------------------------|----------|
| Copies of the NMR spectra of synthesized compounds (5-35)<br>using CDCl <sub>3</sub> as solvent: | 2-32     |

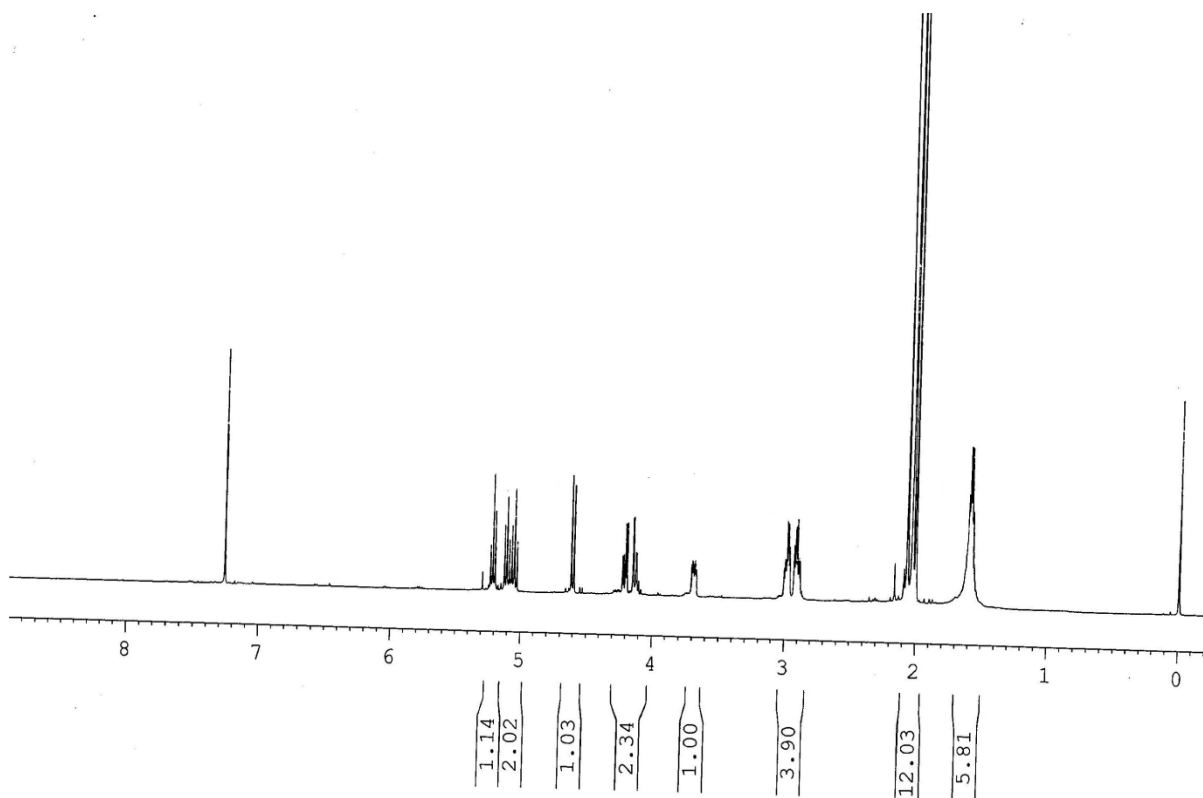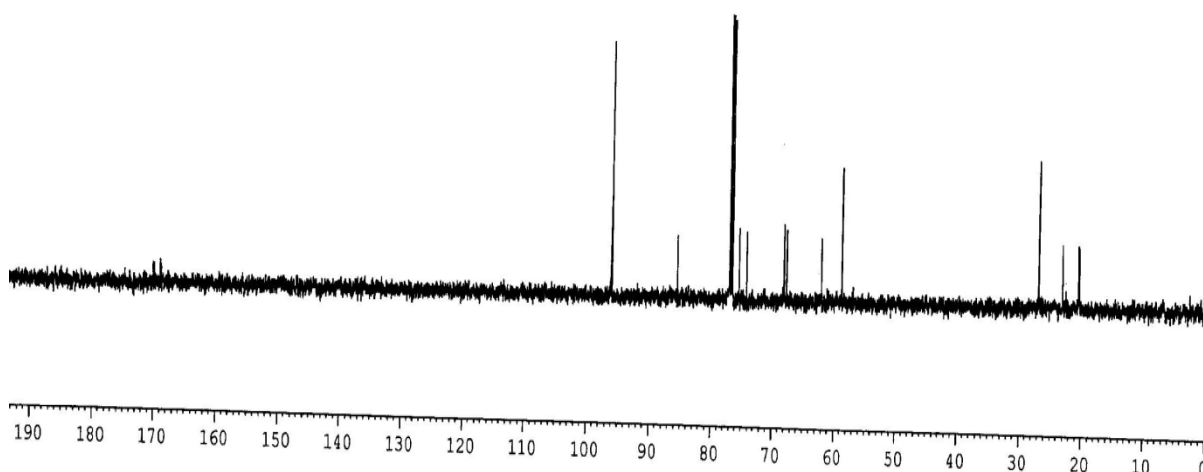

$^1\text{H}$  and  $^{13}\text{C}$  NMR spectra of compound **5** ( $\text{CDCl}_3$ ).

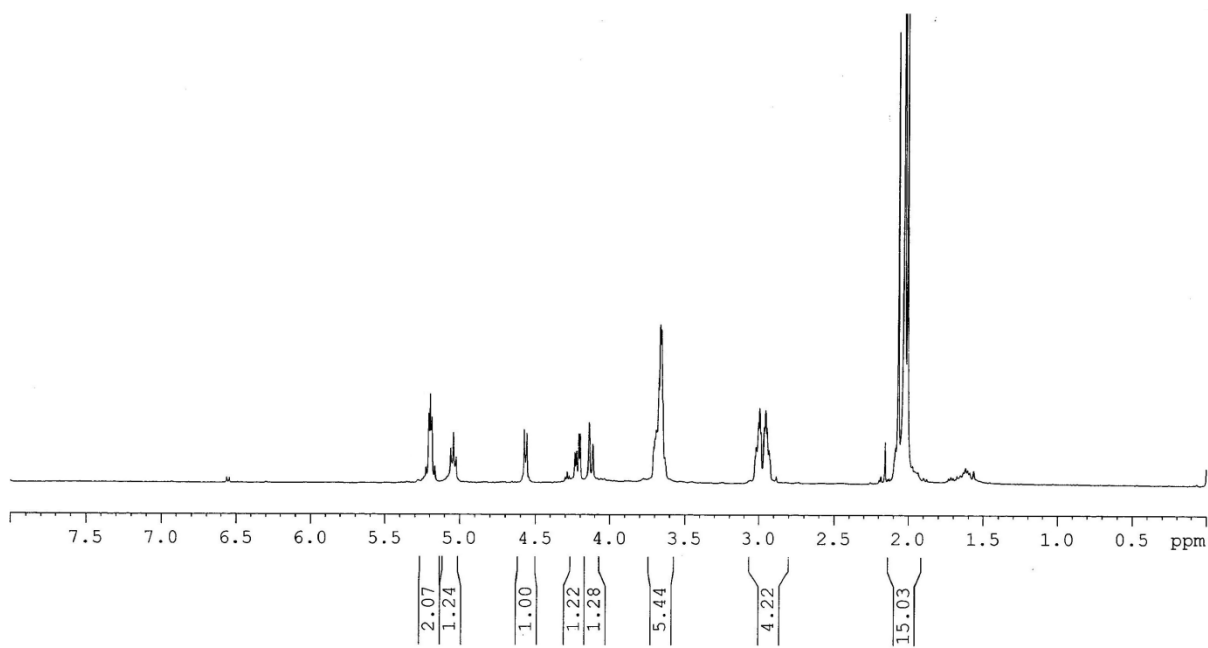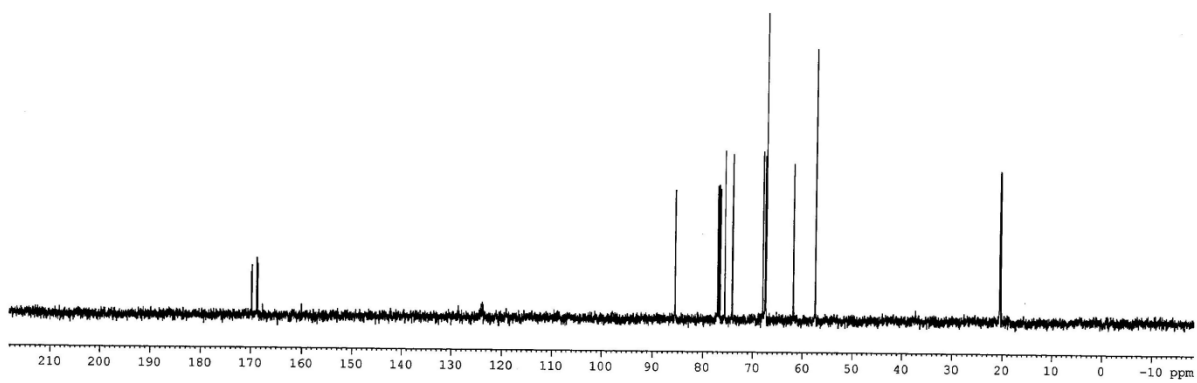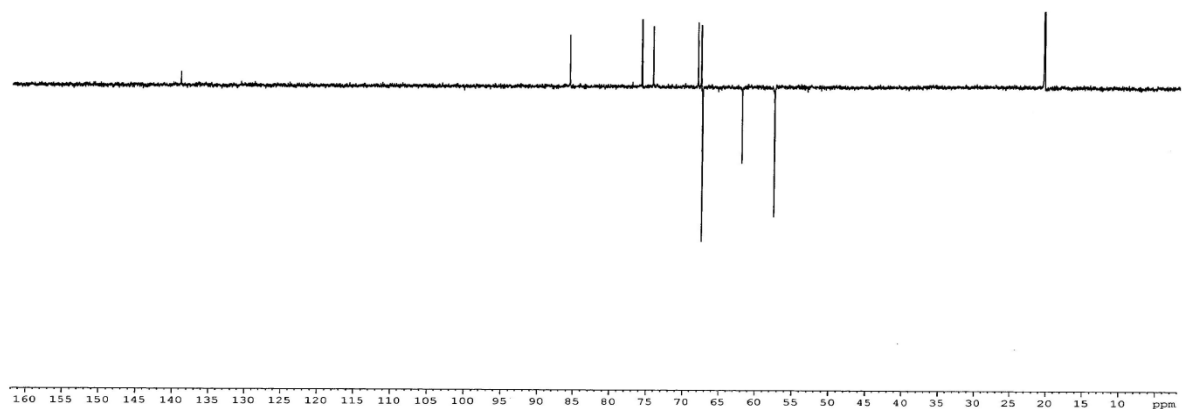

$^1\text{H}$  and  $^{13}\text{C}$  NMR spectra of compound **6** ( $\text{CDCl}_3$ ).

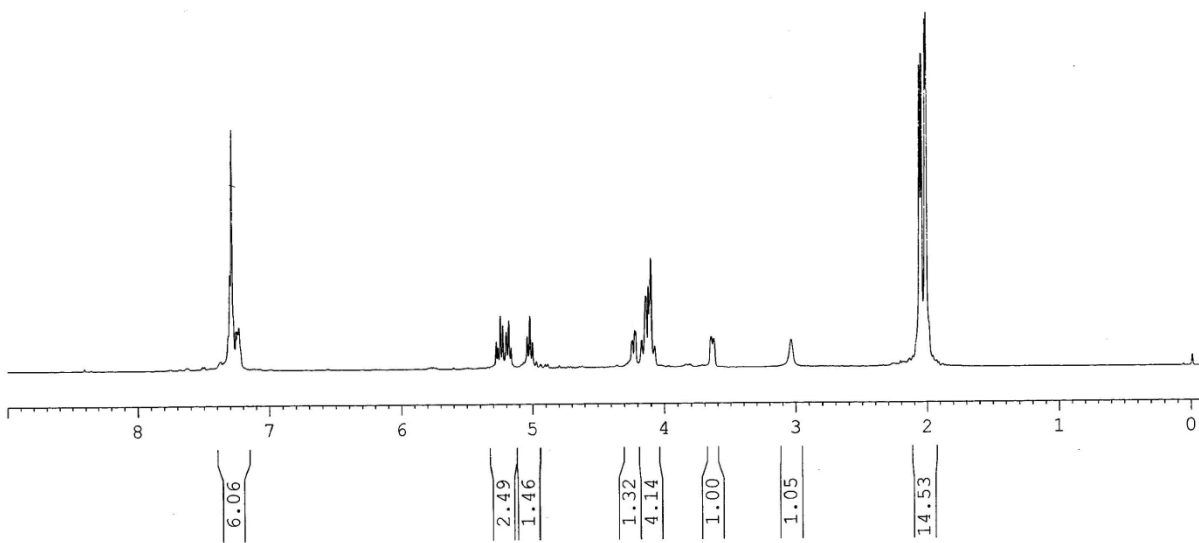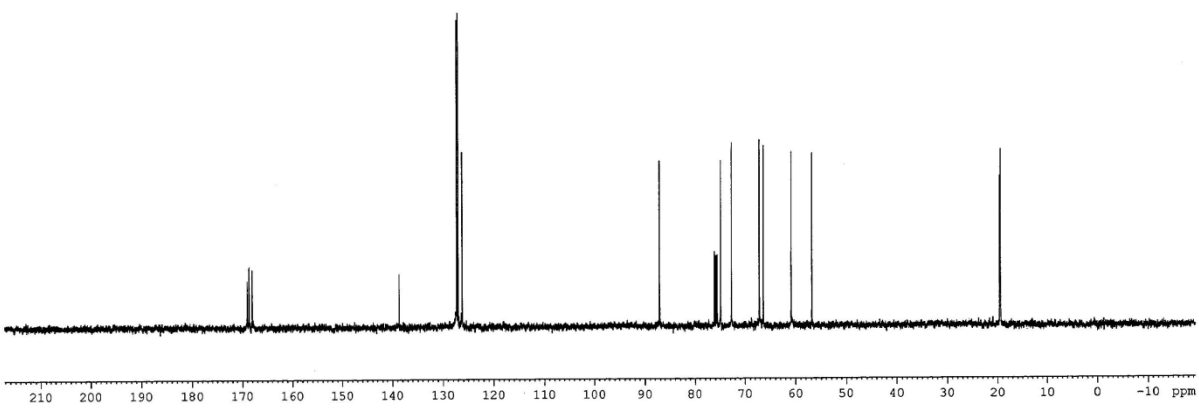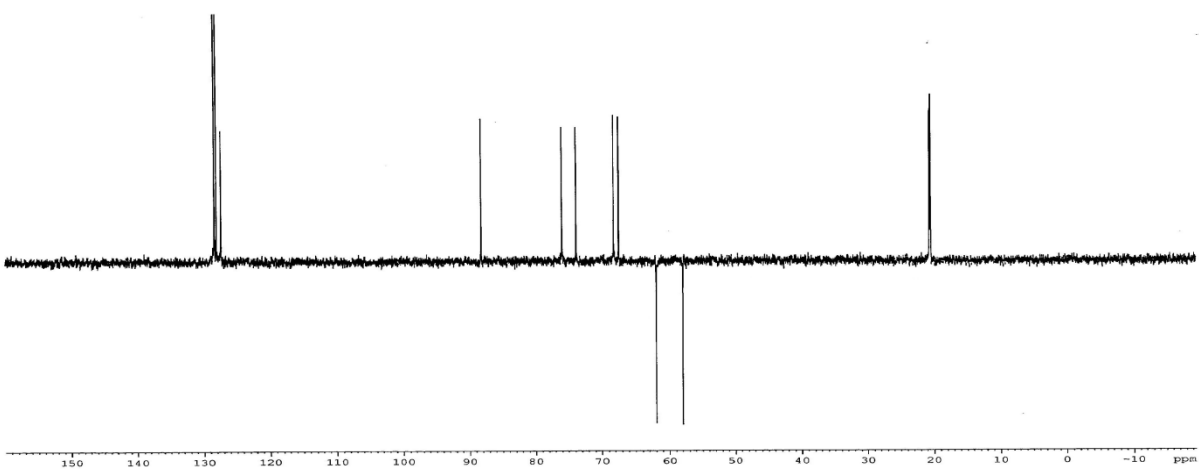

$^1\text{H}$  and  $^{13}\text{C}$  NMR spectra of compound **7** ( $\text{CDCl}_3$ ).

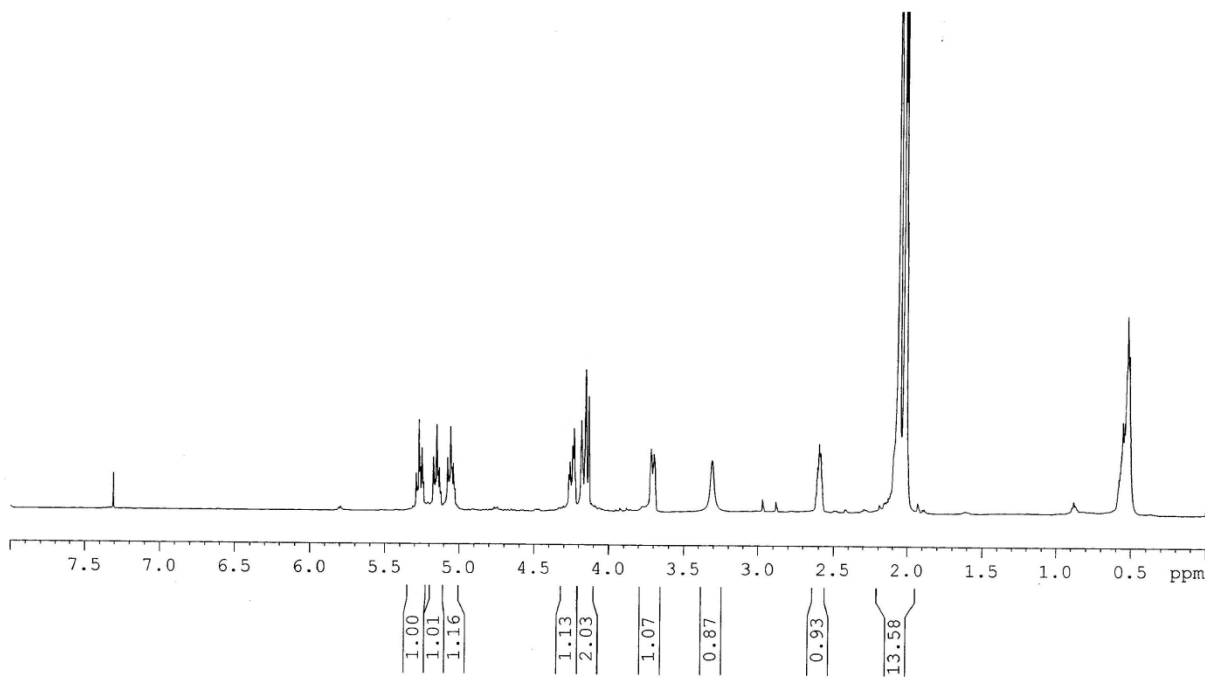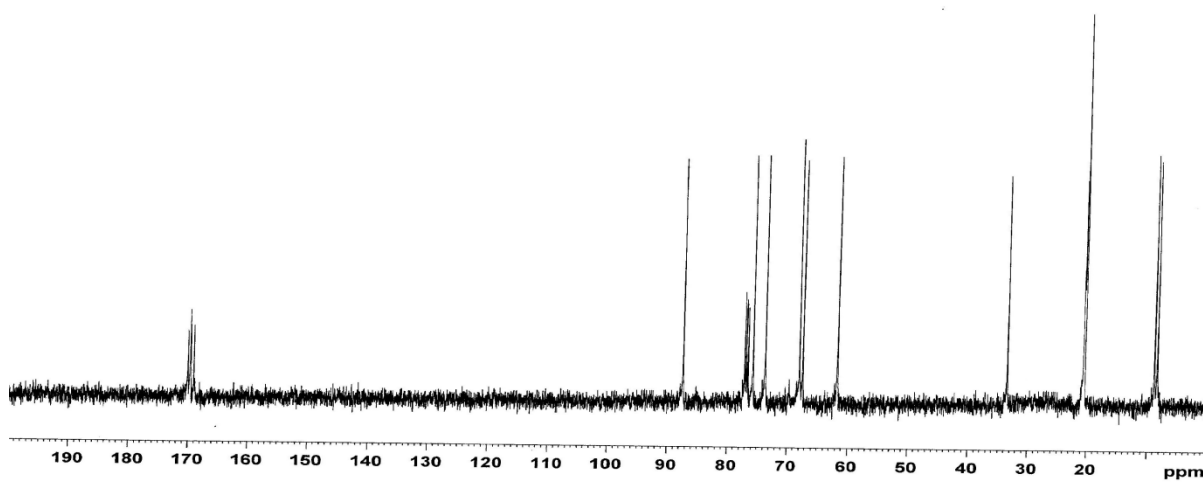

$^1\text{H}$  and  $^{13}\text{C}$  NMR spectra of compound **8** ( $\text{CDCl}_3$ ).

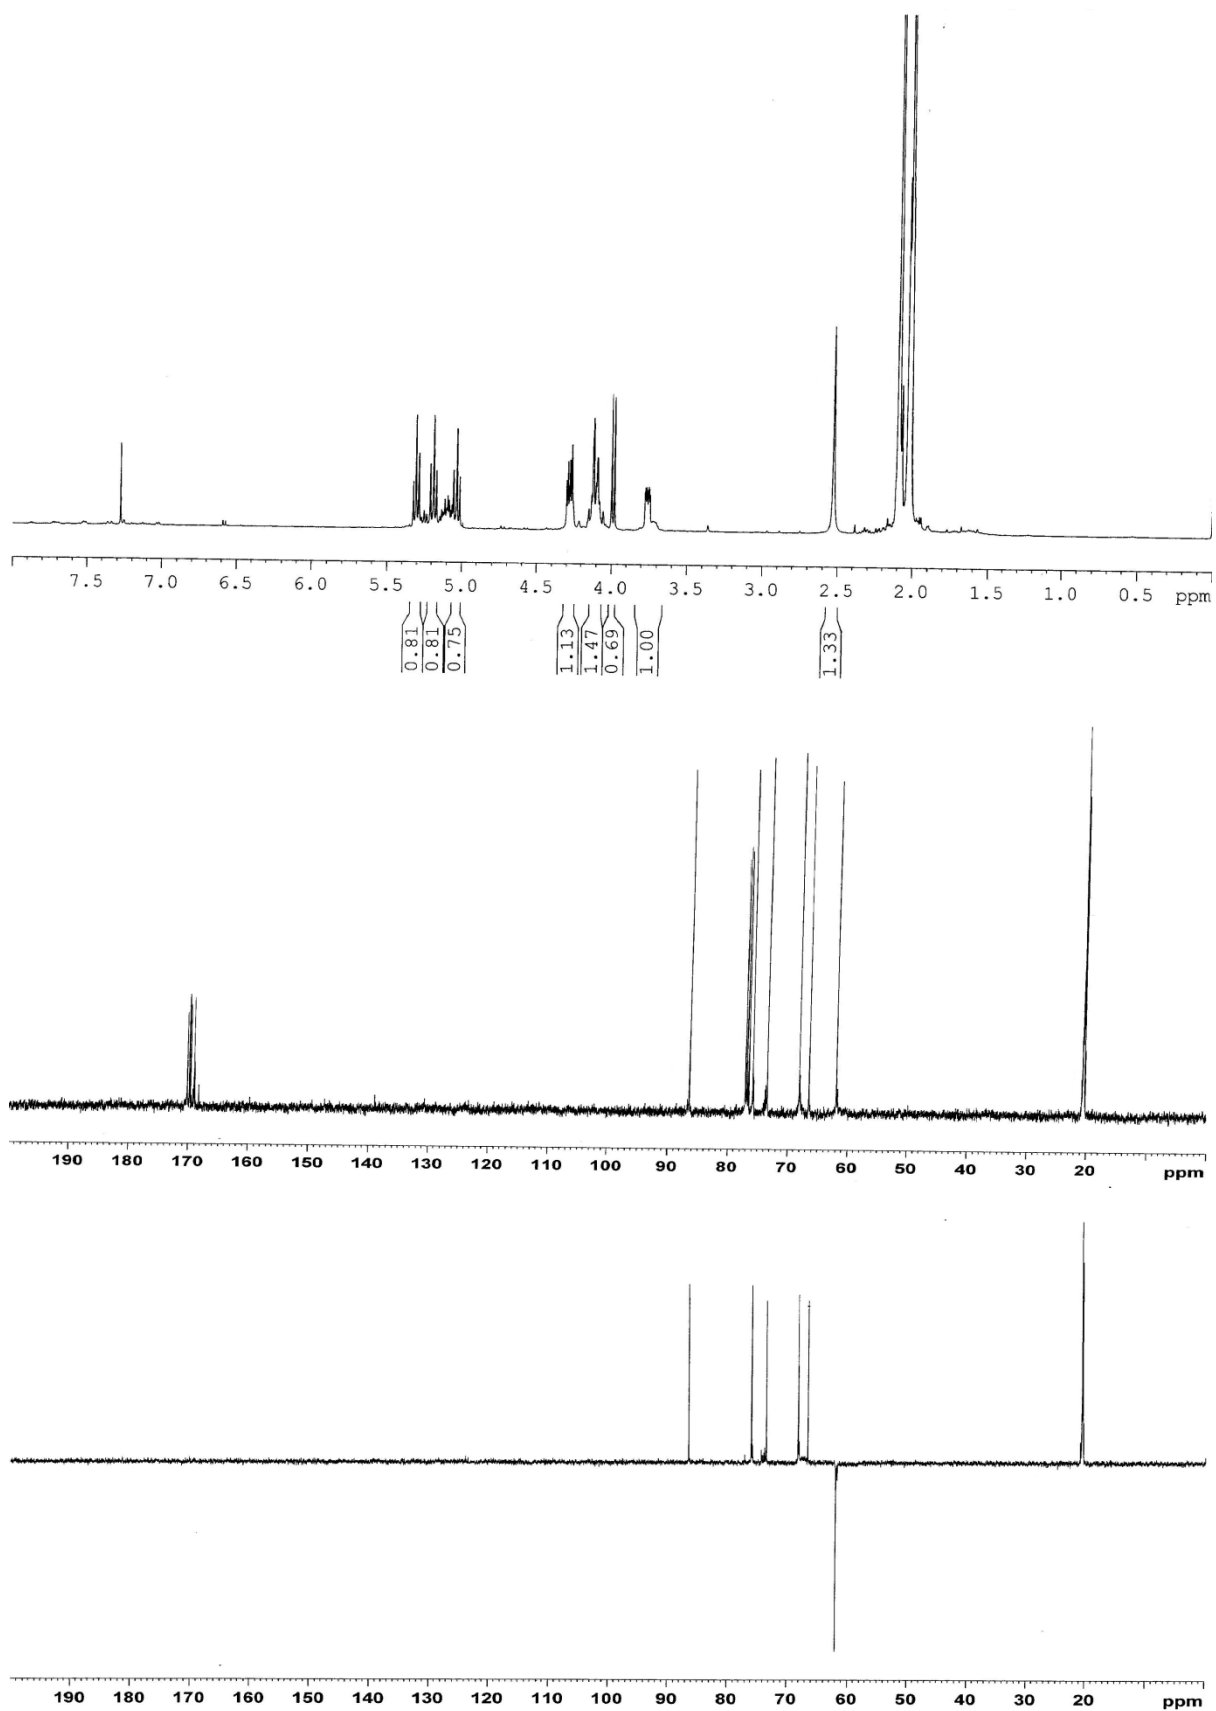

$^1\text{H}$  and  $^{13}\text{C}$  NMR spectra of compound **9** ( $\text{CDCl}_3$ ).

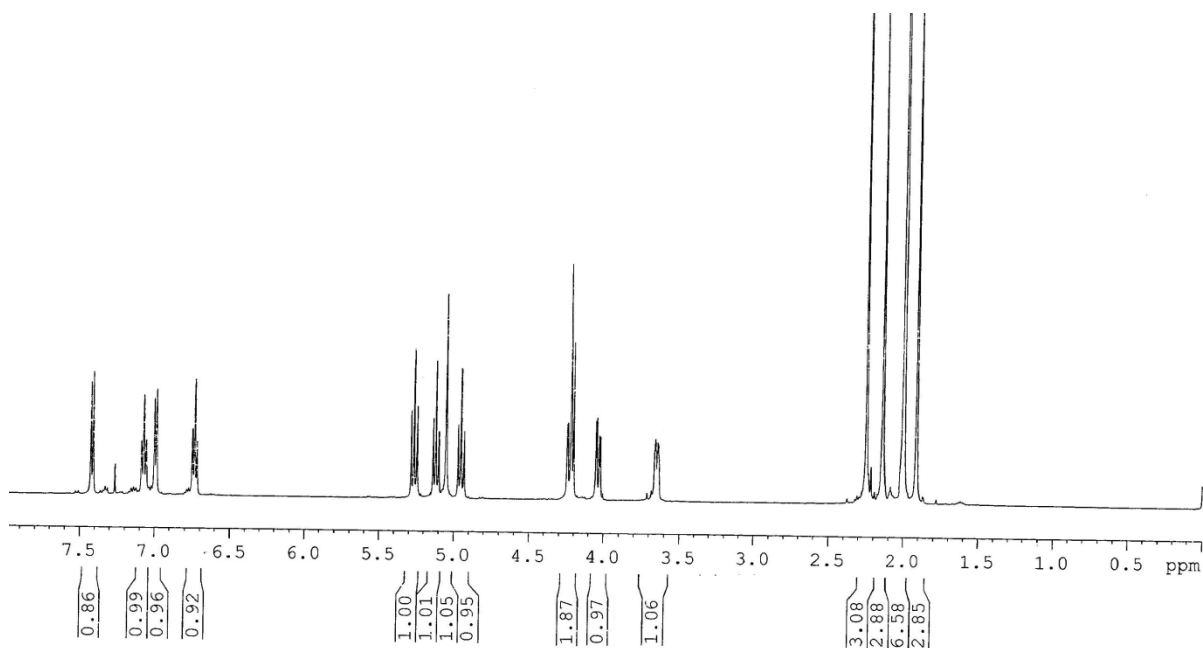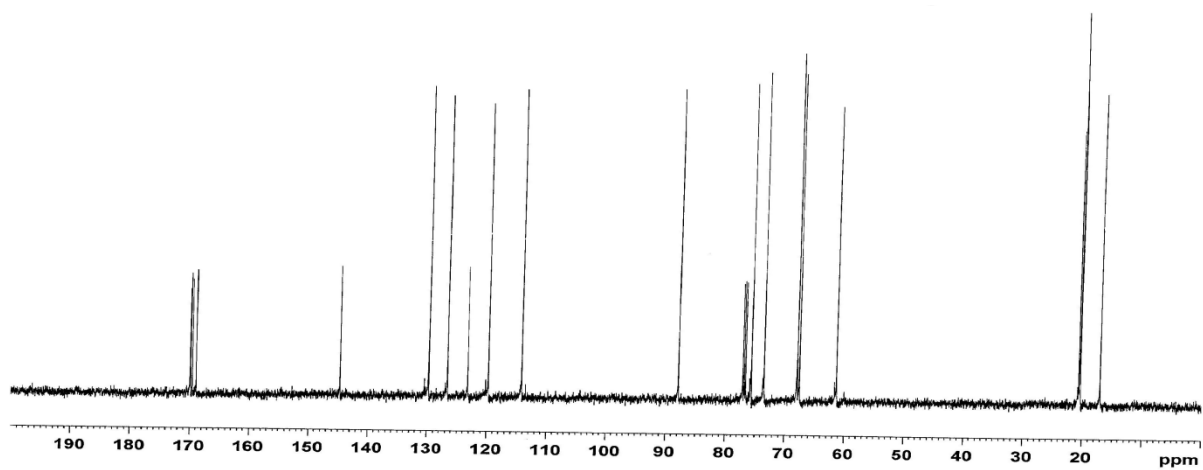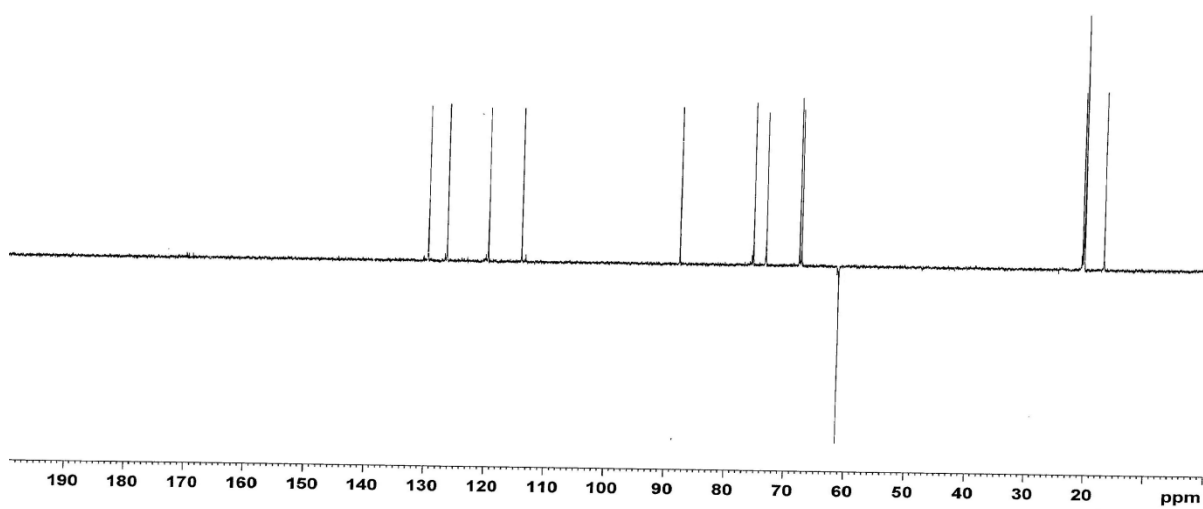

$^1\text{H}$  and  $^{13}\text{C}$  NMR spectra of compound **10** ( $\text{CDCl}_3$ ).

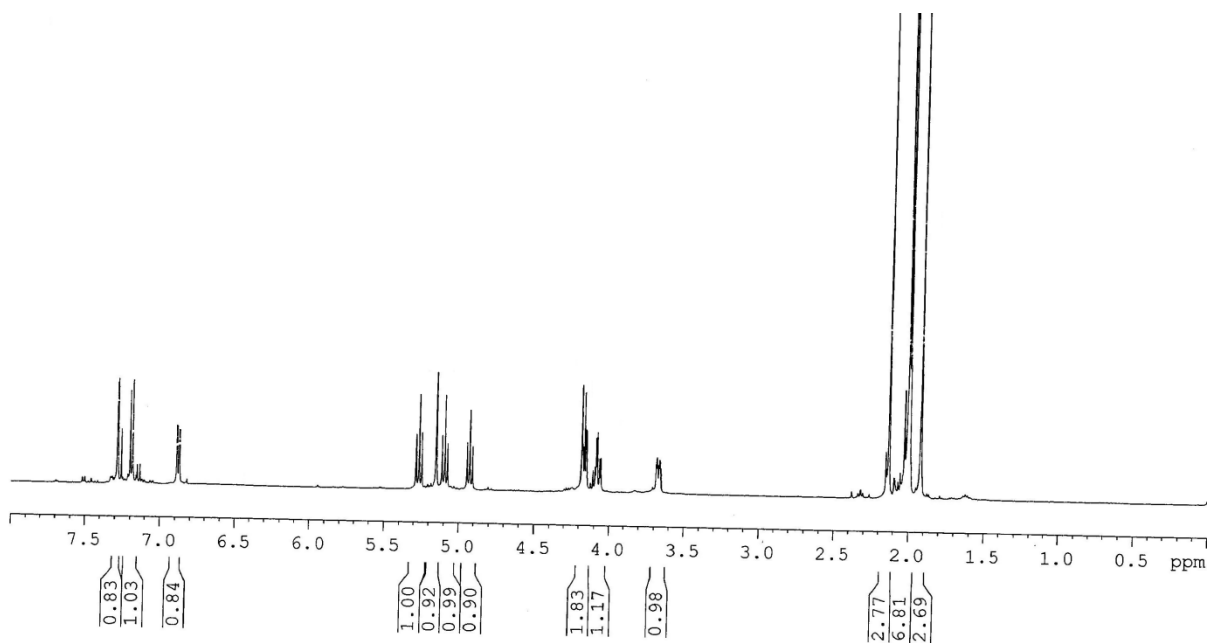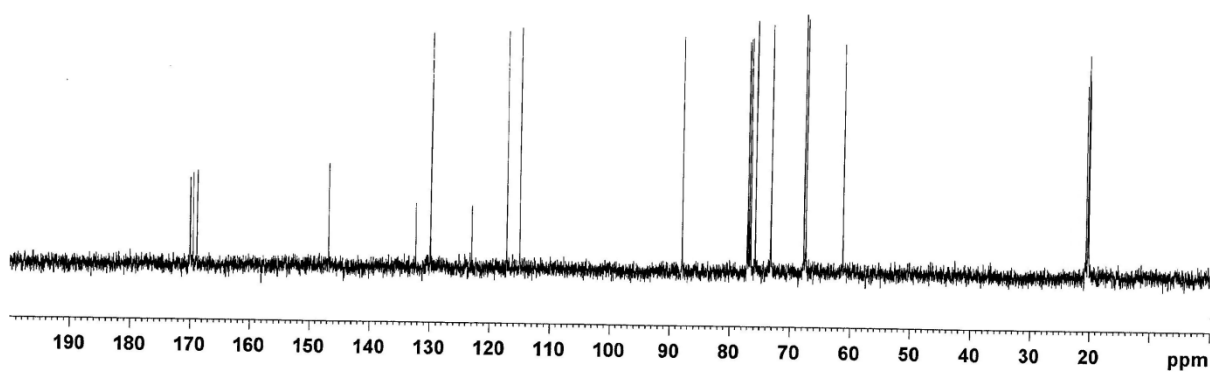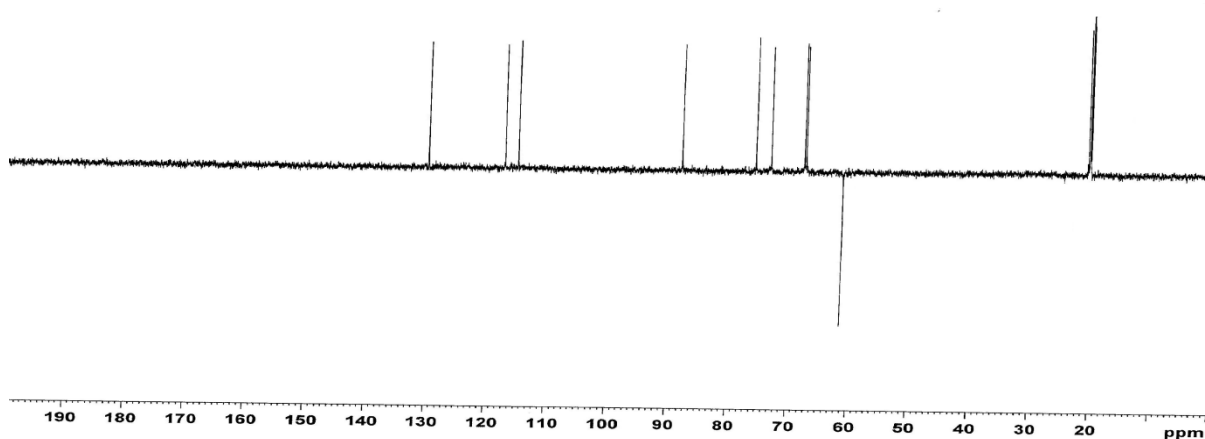

$^1\text{H}$  and  $^{13}\text{C}$  NMR spectra of compound **11** ( $\text{CDCl}_3$ ).



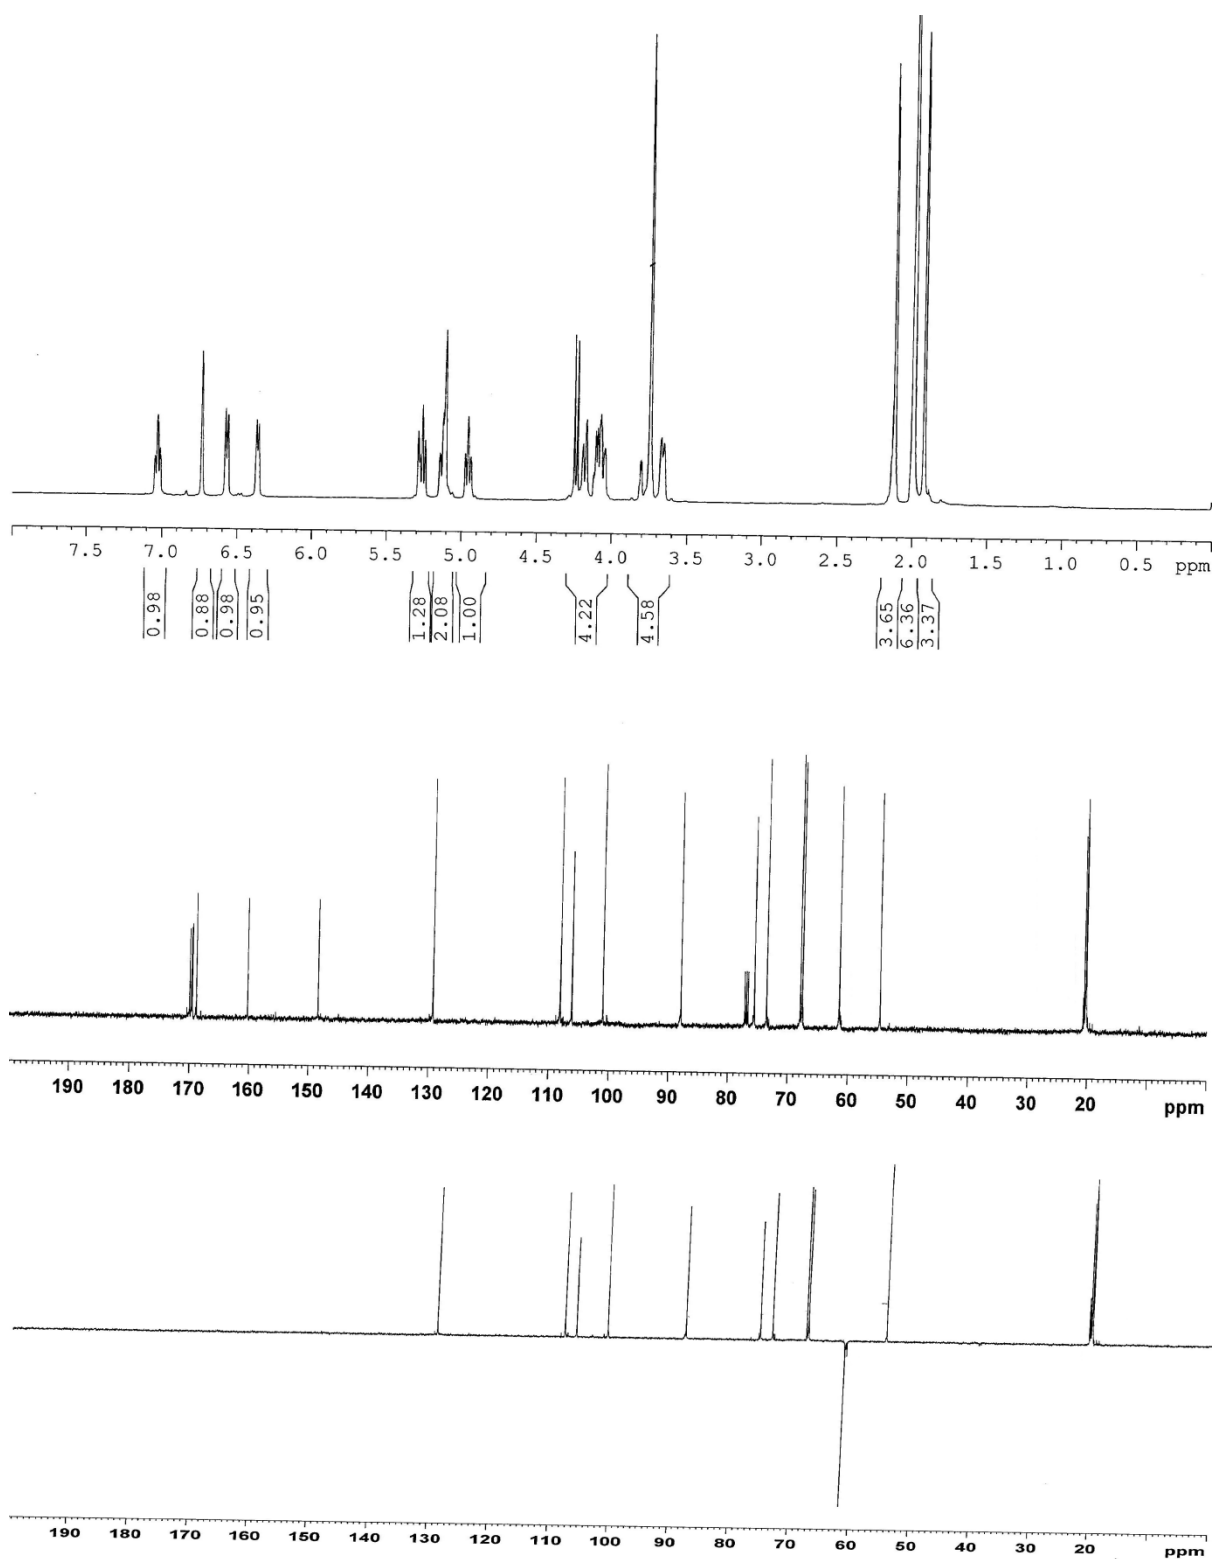

<sup>1</sup>H and <sup>13</sup>C NMR spectra of compound **12** (CDCl<sub>3</sub>).

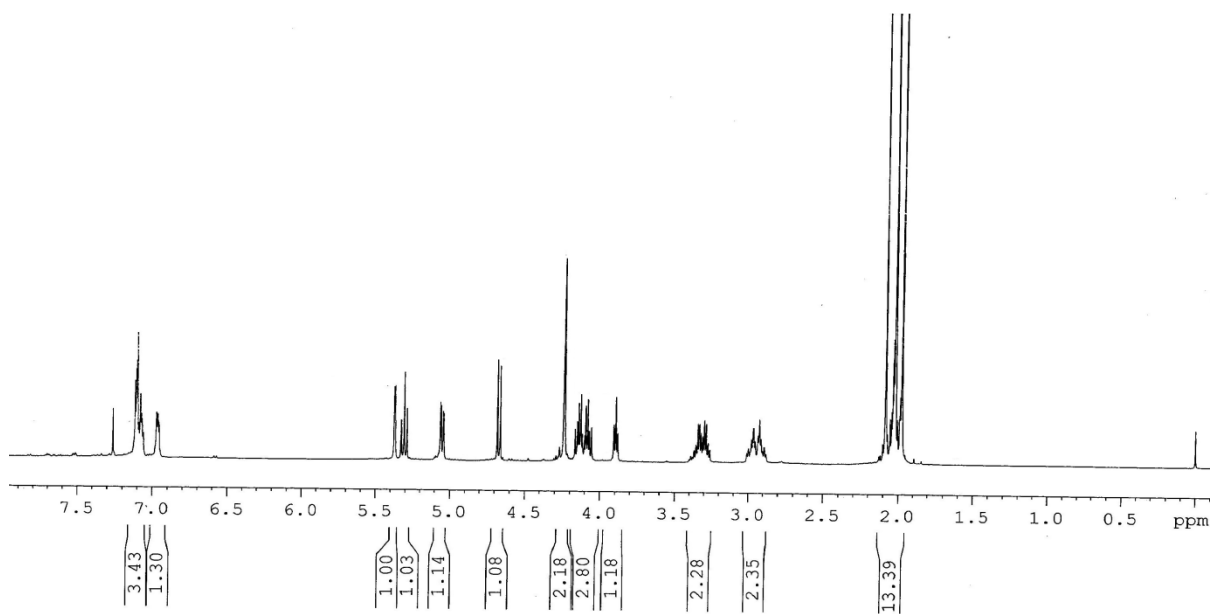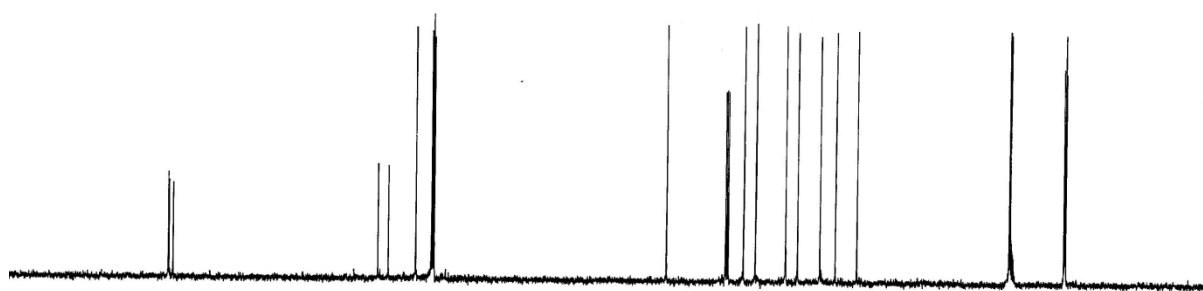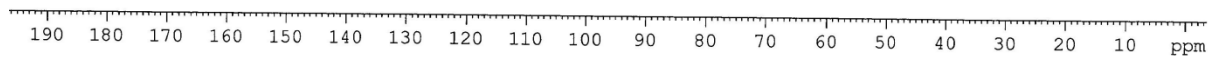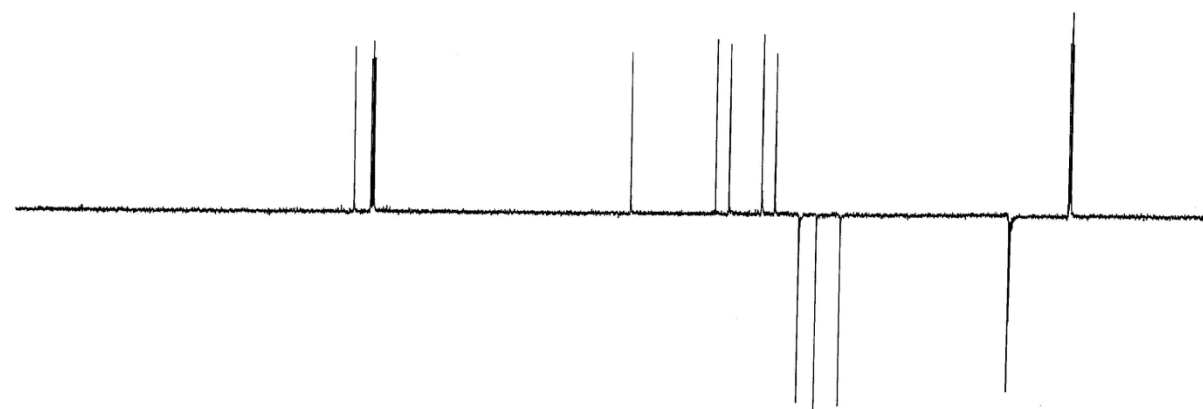

$^1\text{H}$  and  $^{13}\text{C}$  NMR spectra of compound **13** ( $\text{CDCl}_3$ ).

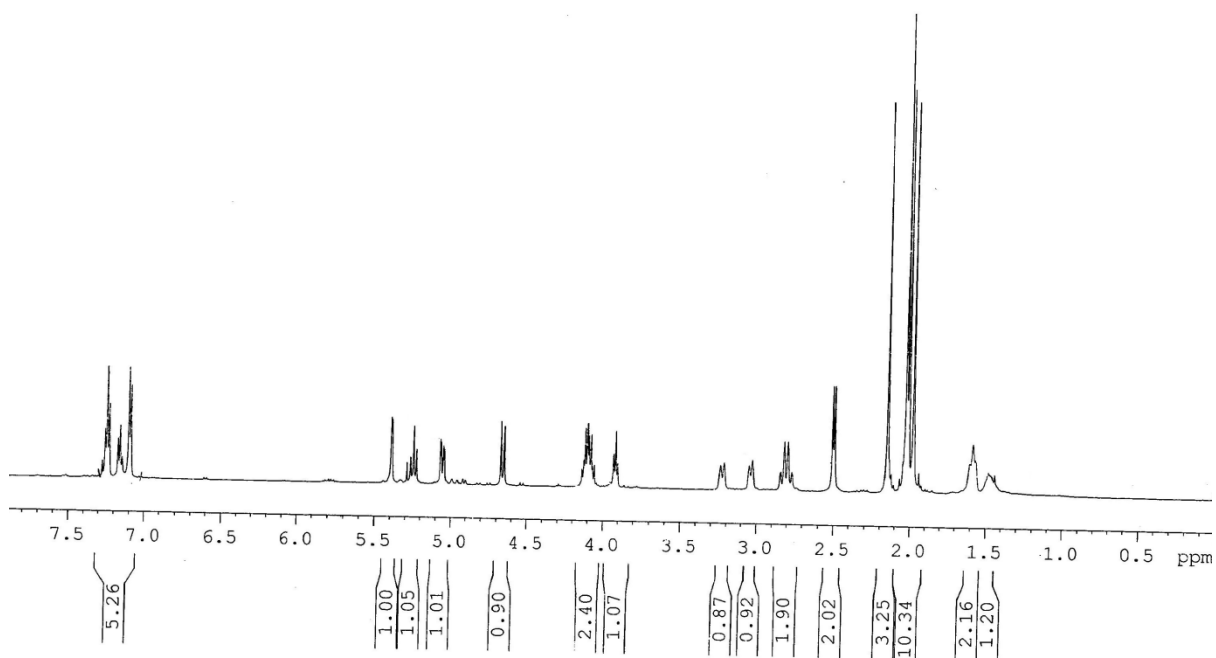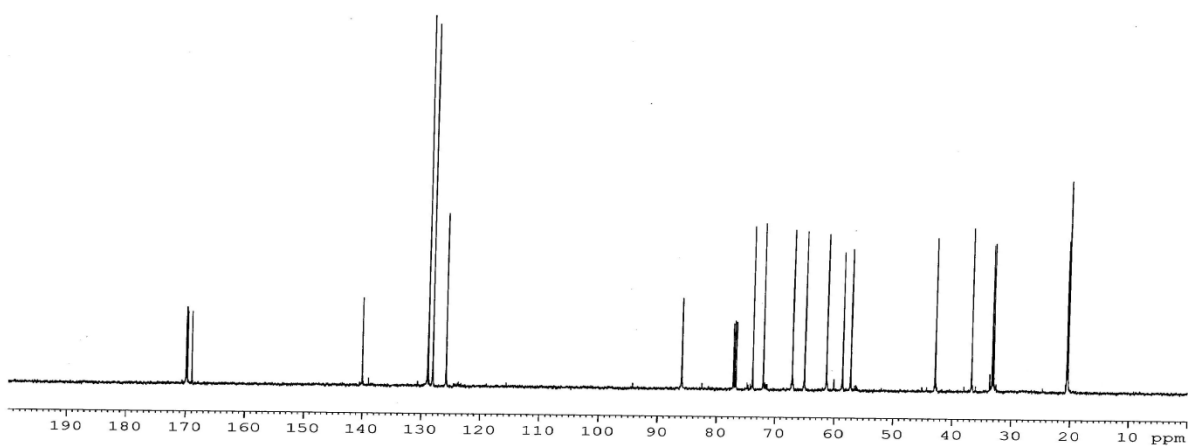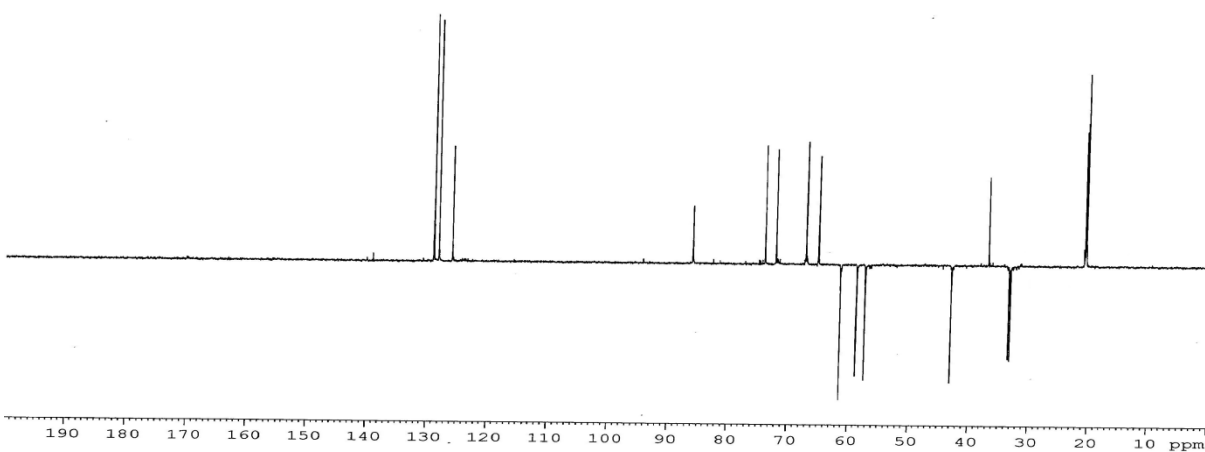

$^1\text{H}$  and  $^{13}\text{C}$  NMR spectra of compound **14** ( $\text{CDCl}_3$ ).

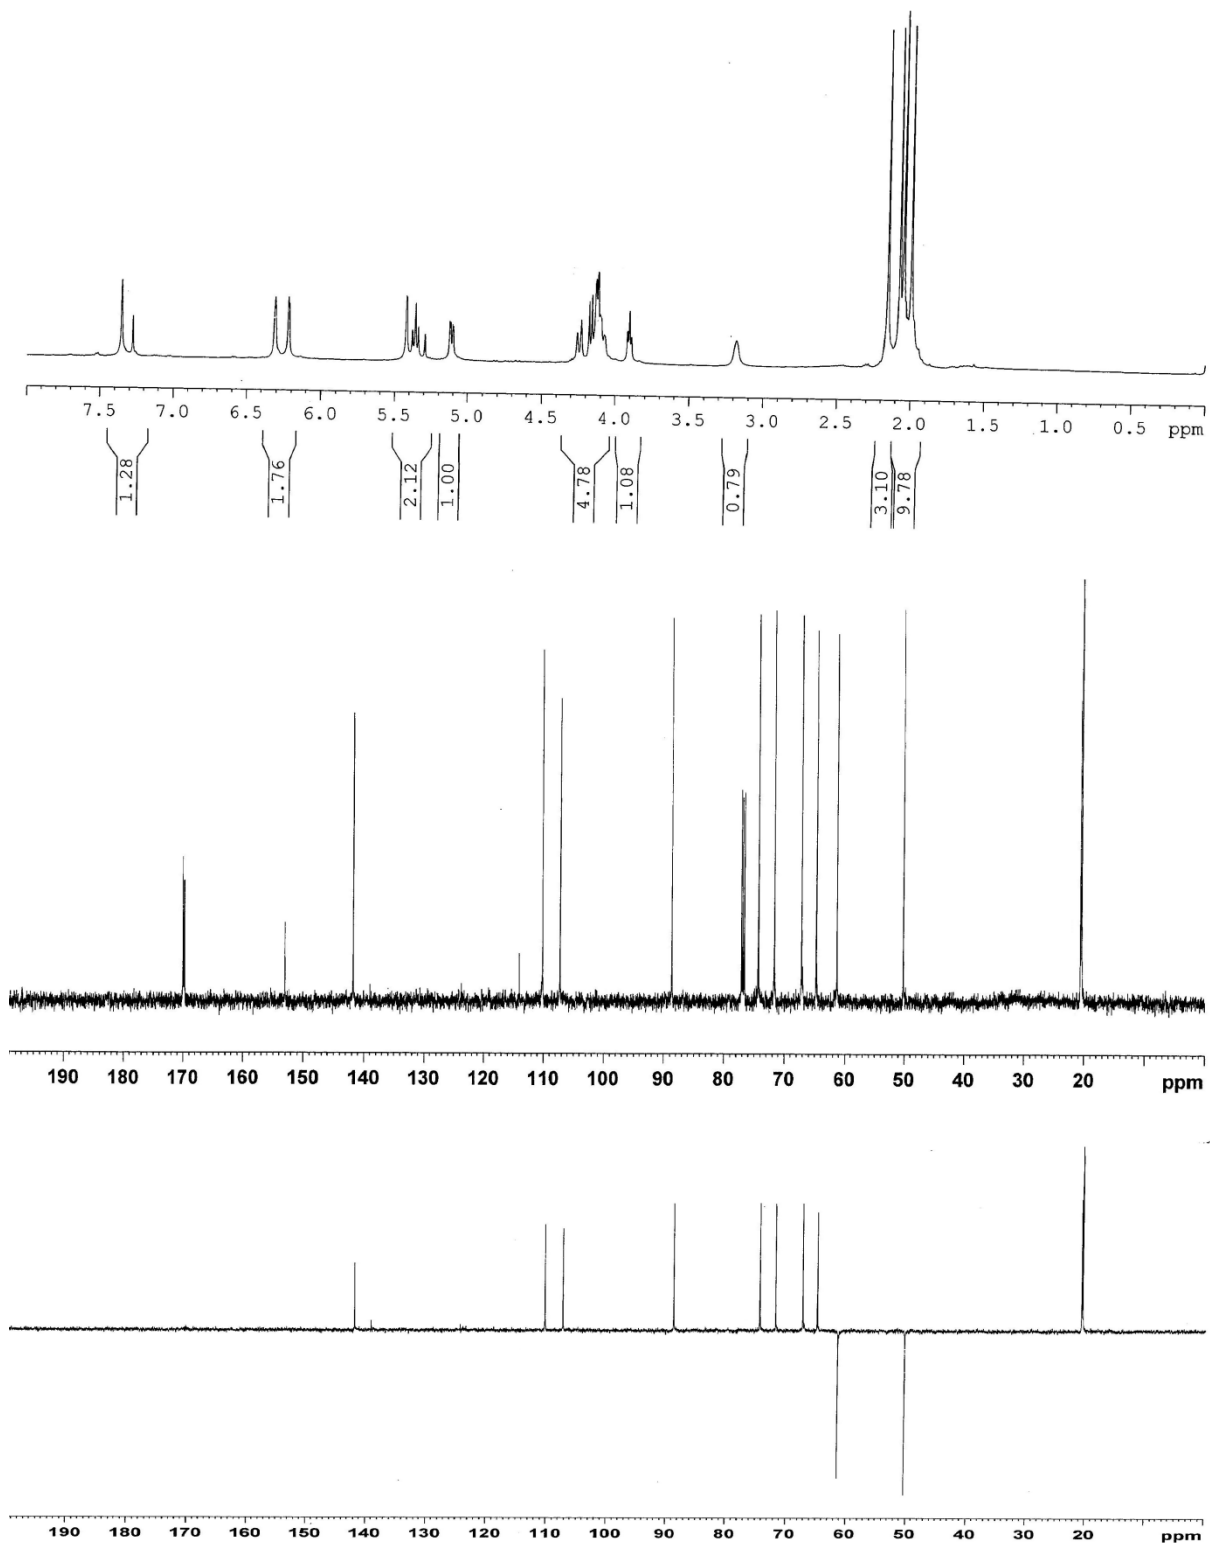

$^1\text{H}$  and  $^{13}\text{C}$  NMR spectra of compound **15** ( $\text{CDCl}_3$ ).

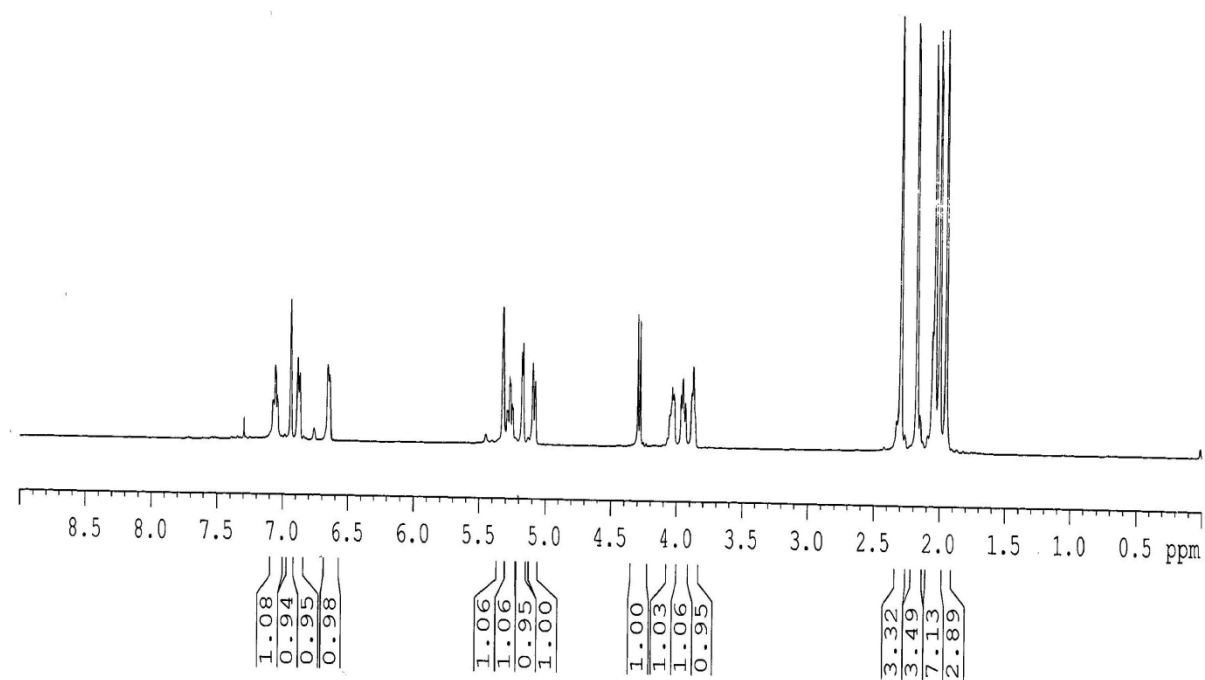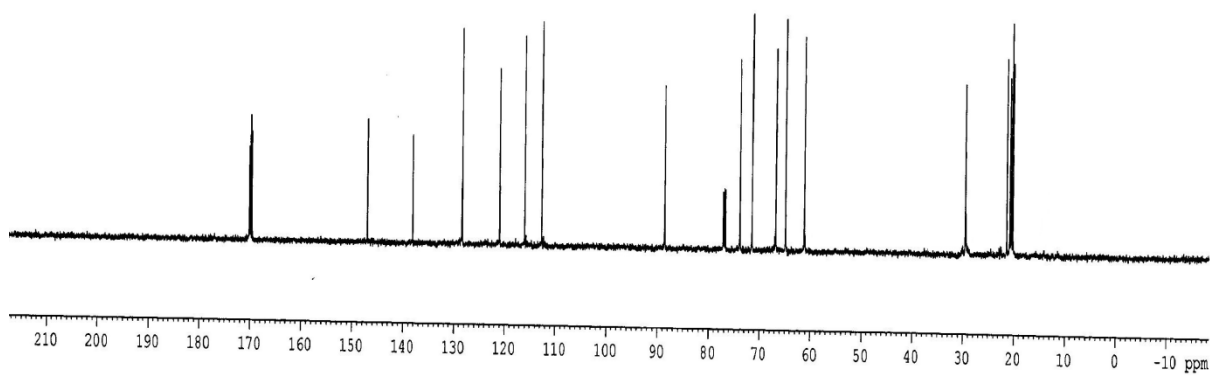

$^1\text{H}$  and  $^{13}\text{C}$  NMR spectra of compound **16** ( $\text{CDCl}_3$ ).

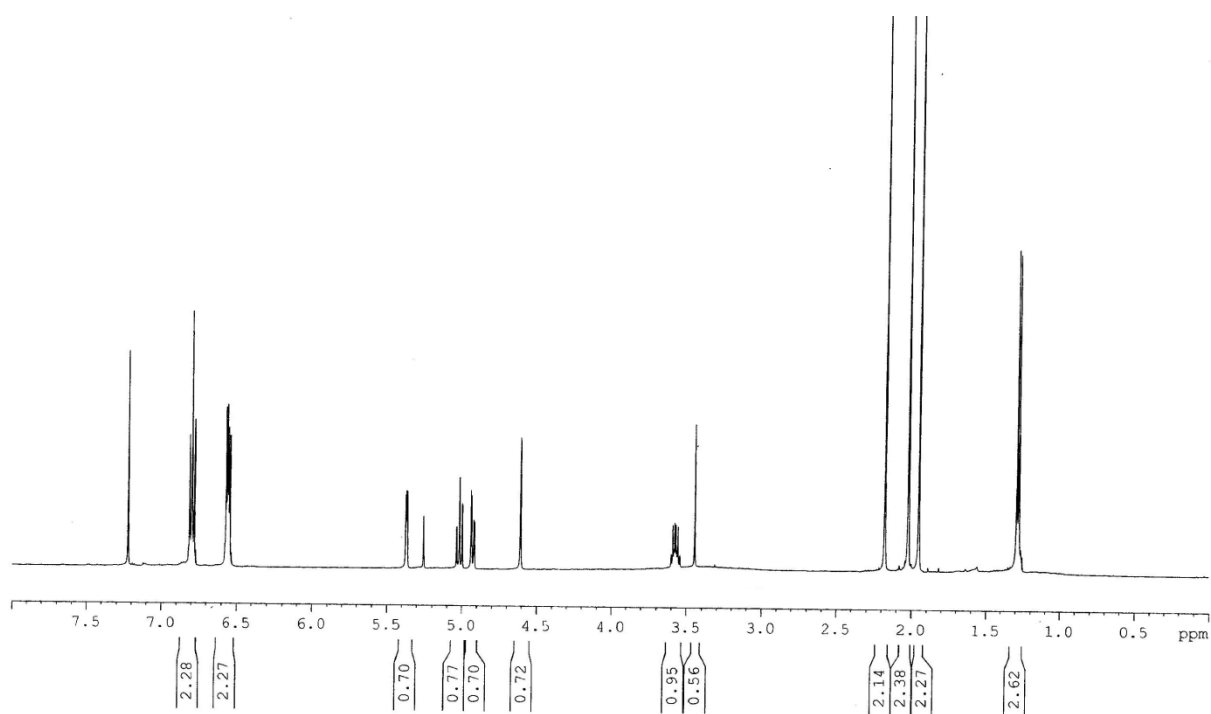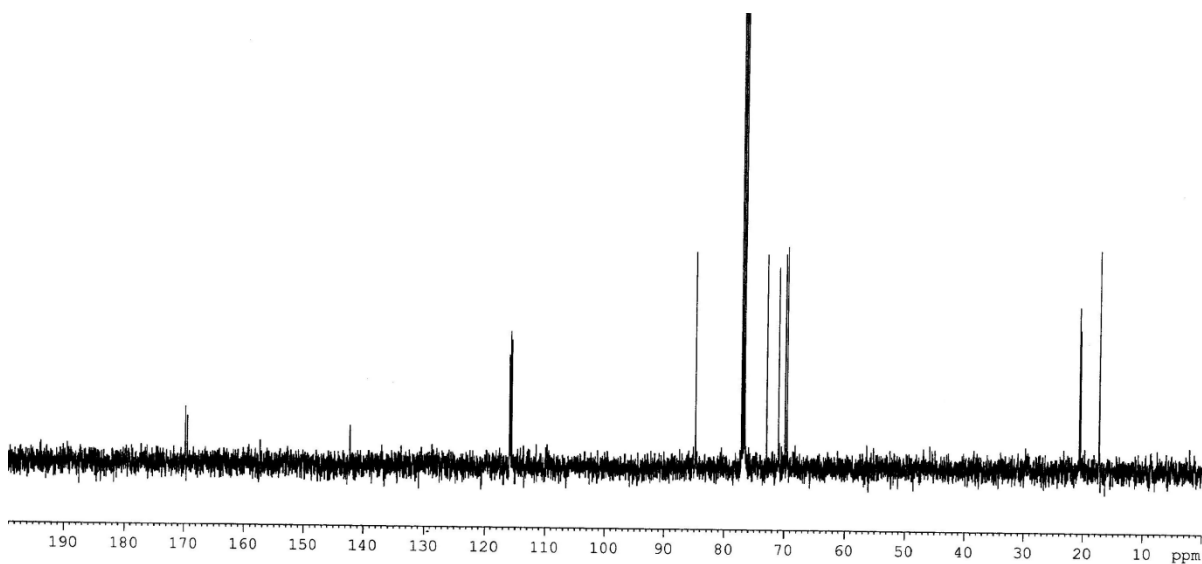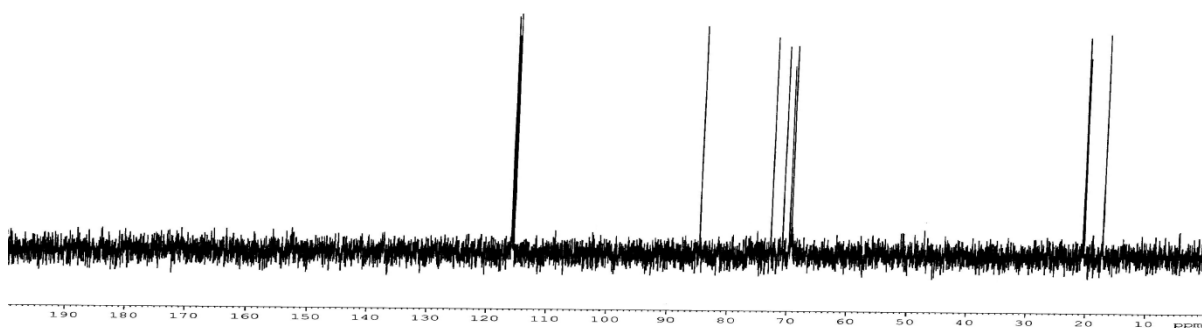

$^1\text{H}$  and  $^{13}\text{C}$  NMR spectra of compound **17** ( $\text{CDCl}_3$ ).

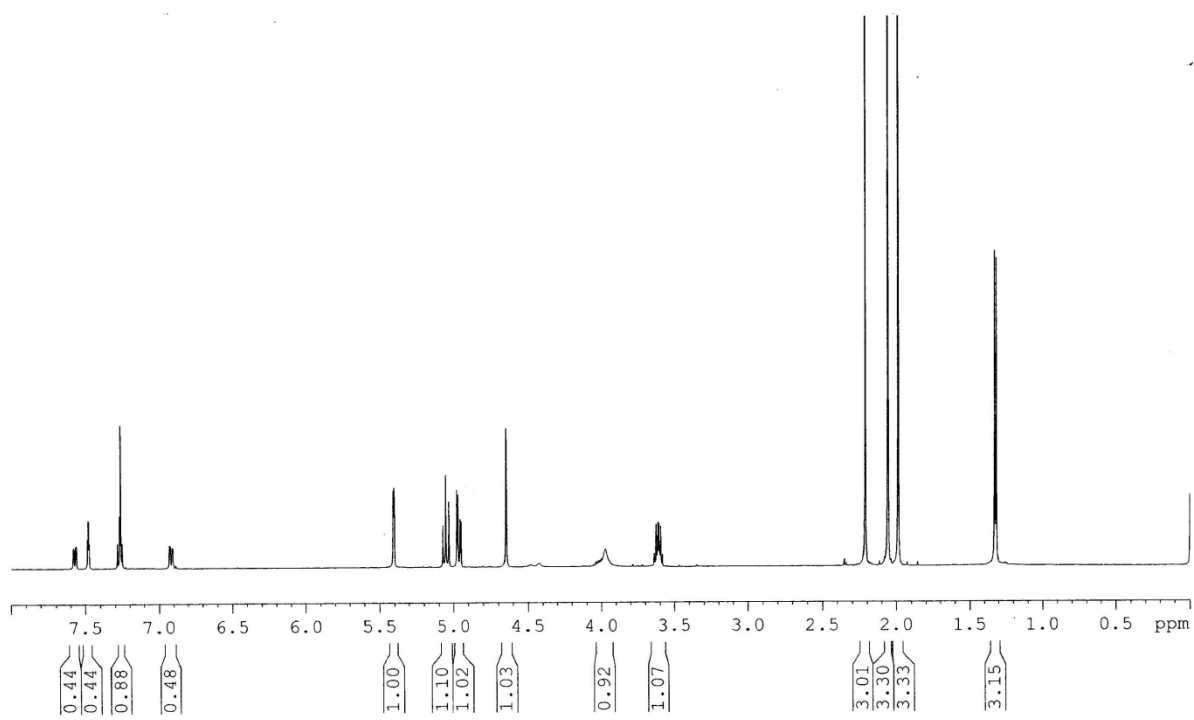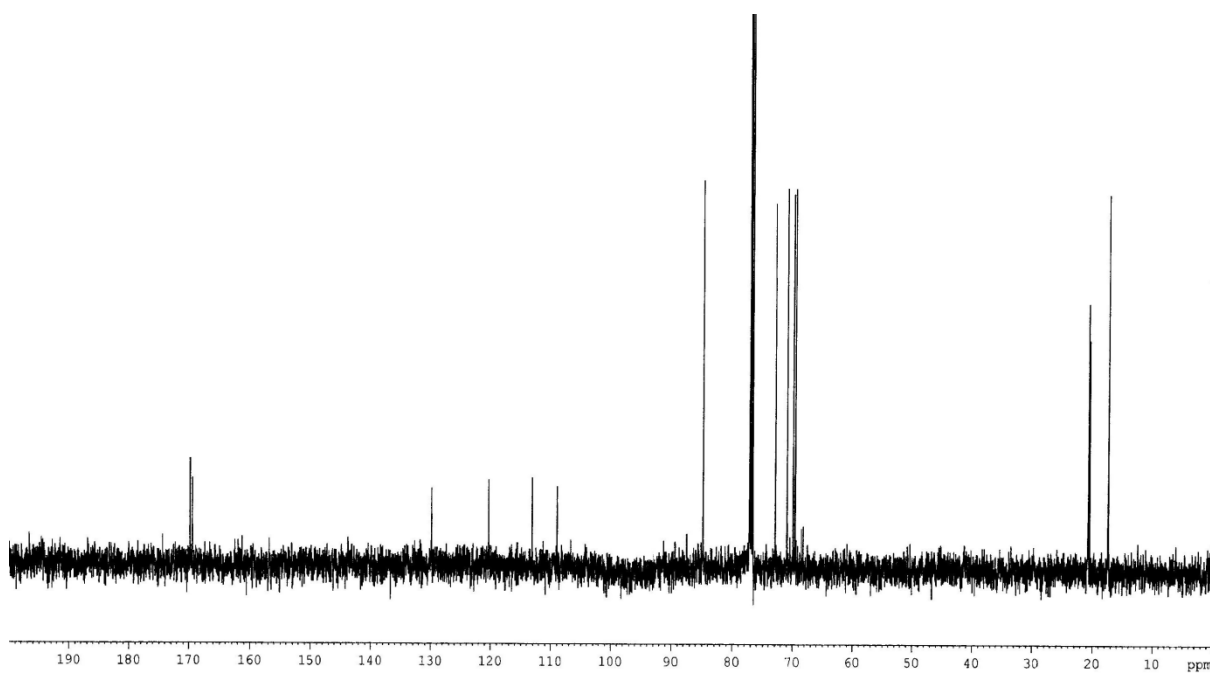

$^1\text{H}$  and  $^{13}\text{C}$  NMR spectra of compound **18** ( $\text{CDCl}_3$ ).

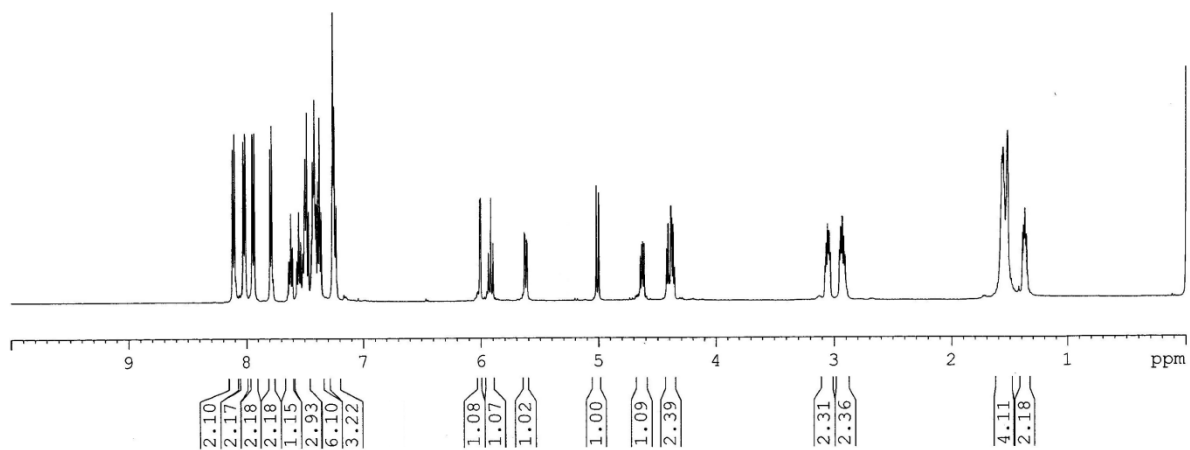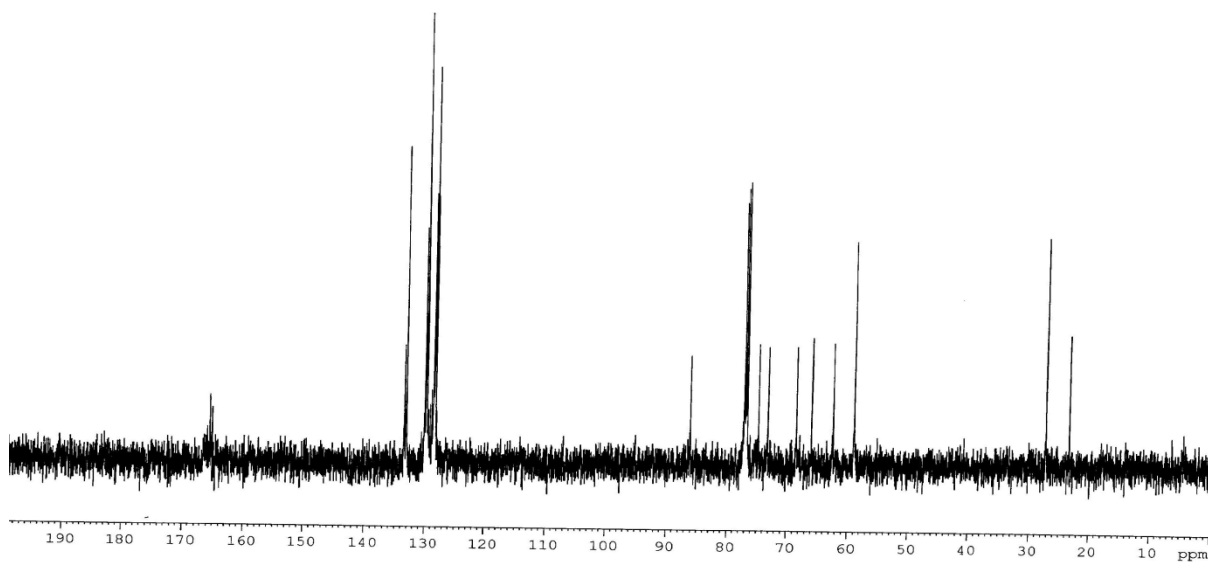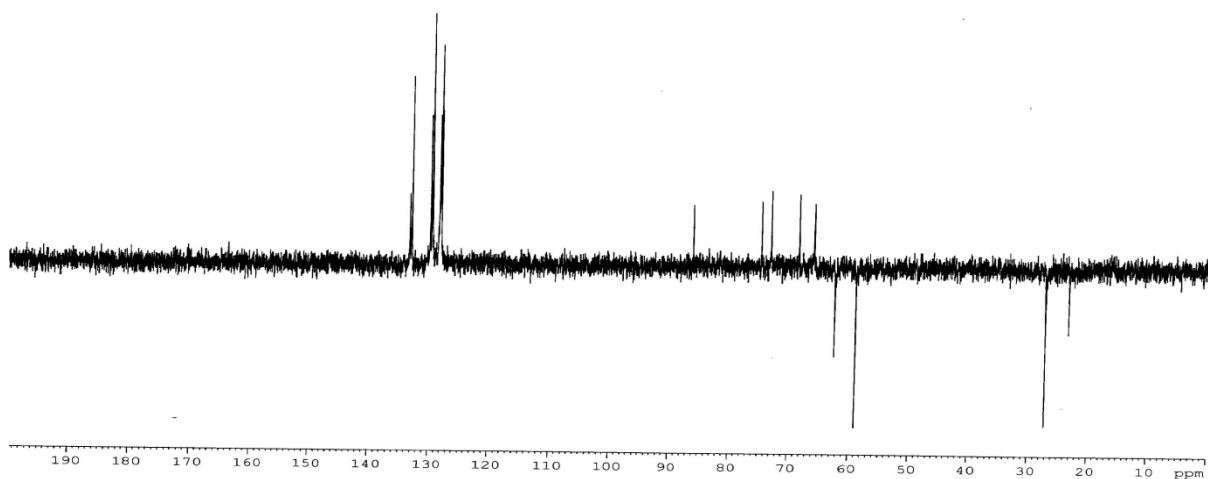

$^1\text{H}$  and  $^{13}\text{C}$  NMR spectra of compound **19** ( $\text{CDCl}_3$ ).



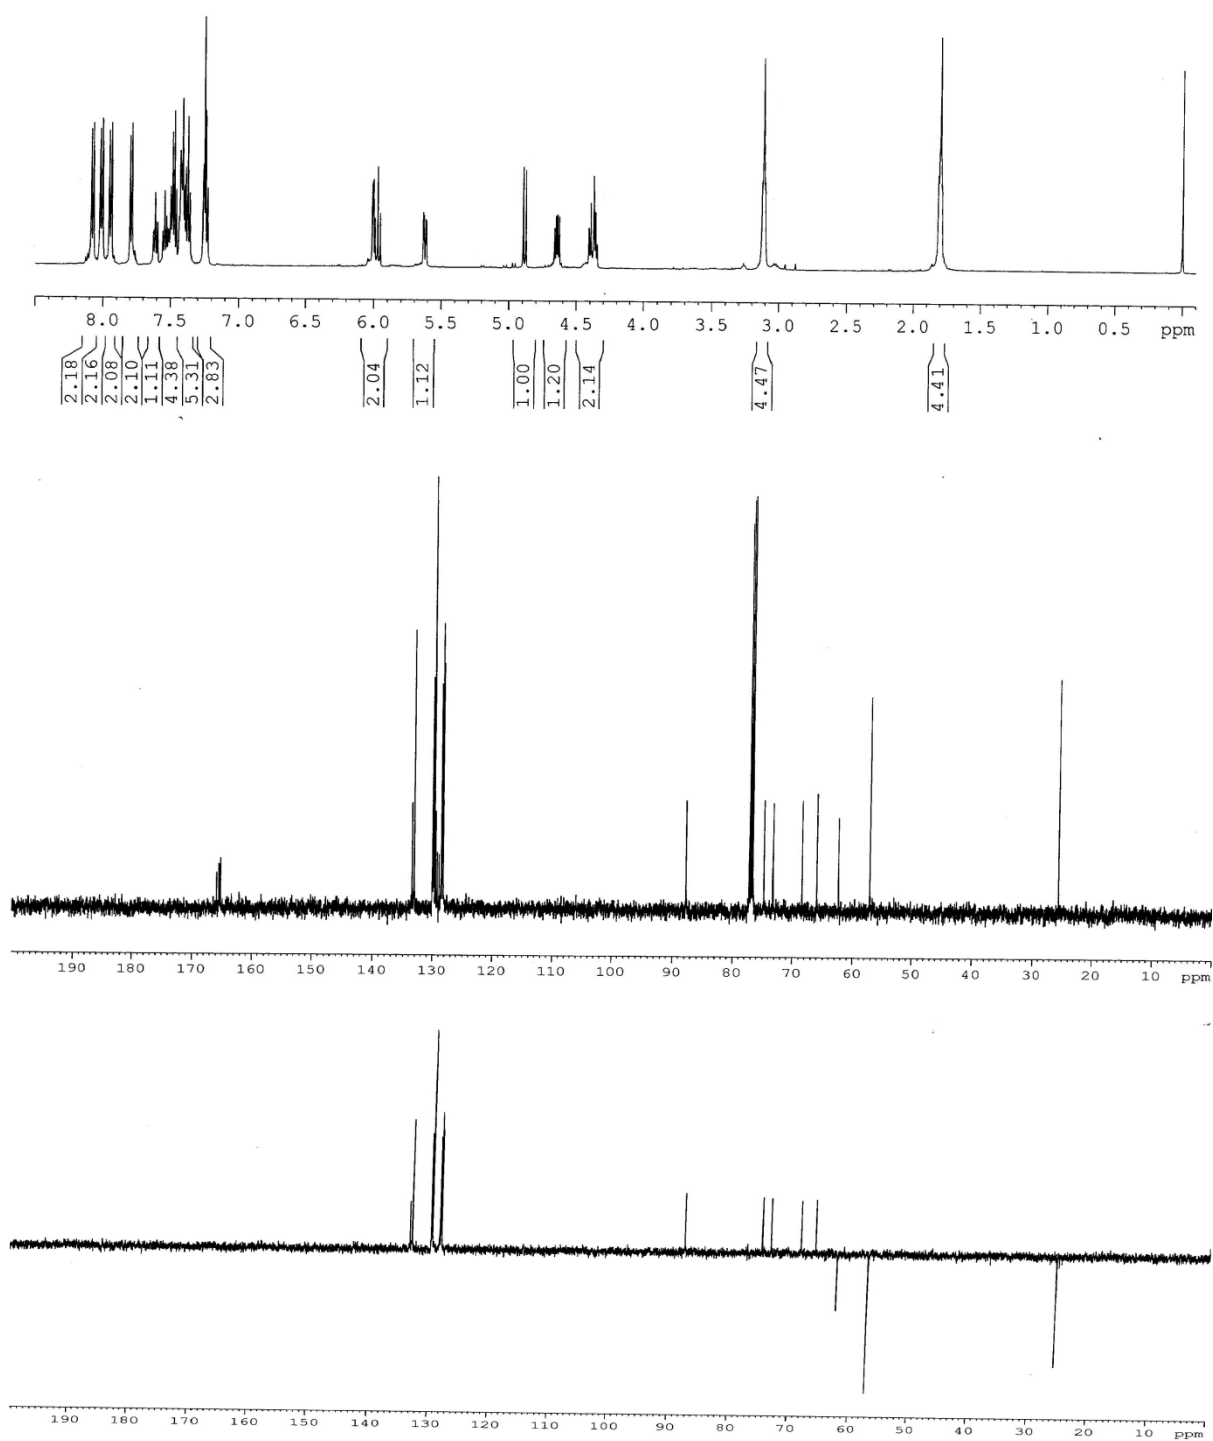

<sup>1</sup>H and <sup>13</sup>C NMR spectra of compound **20** (CDCl<sub>3</sub>).

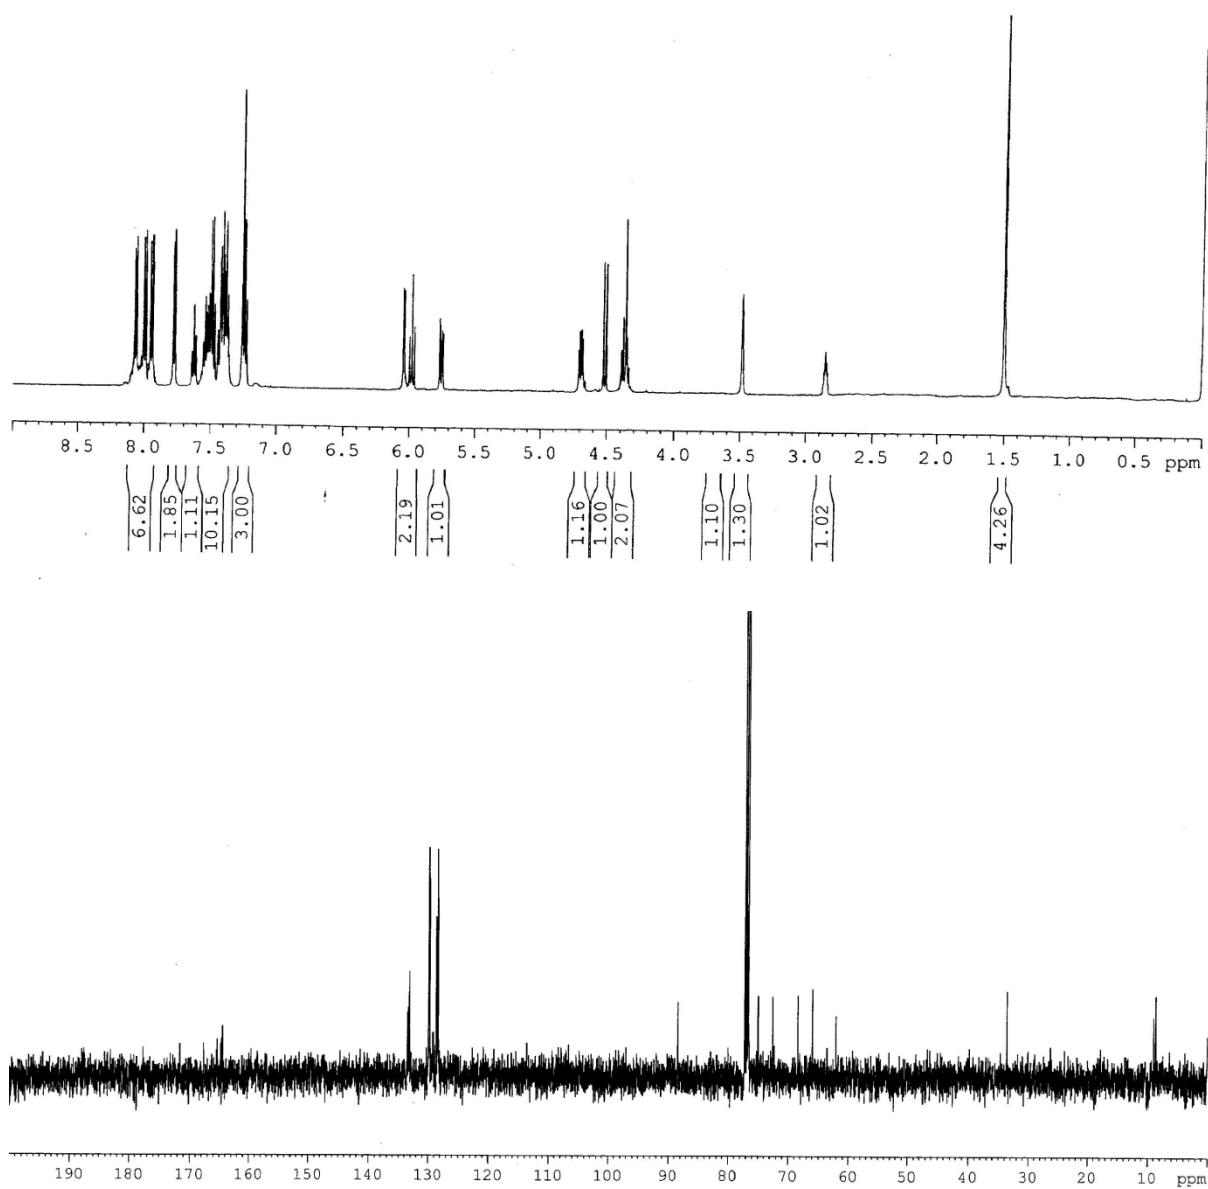

$^1\text{H}$  and  $^{13}\text{C}$  NMR spectra of compound **21** ( $\text{CDCl}_3$ ).

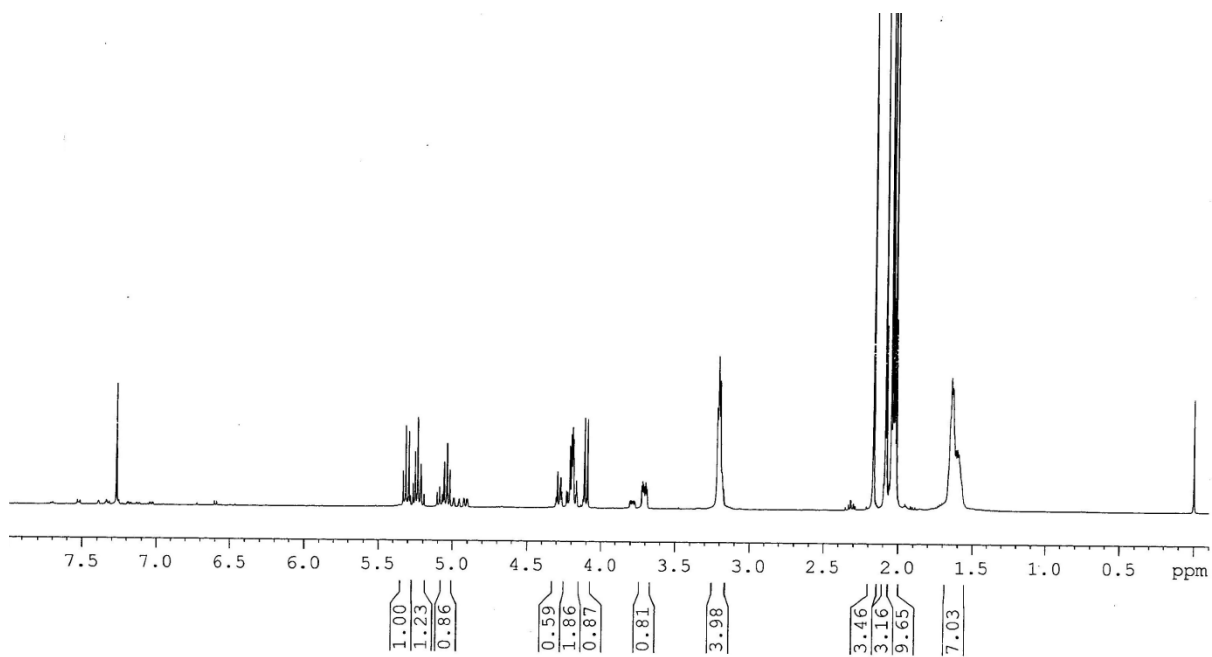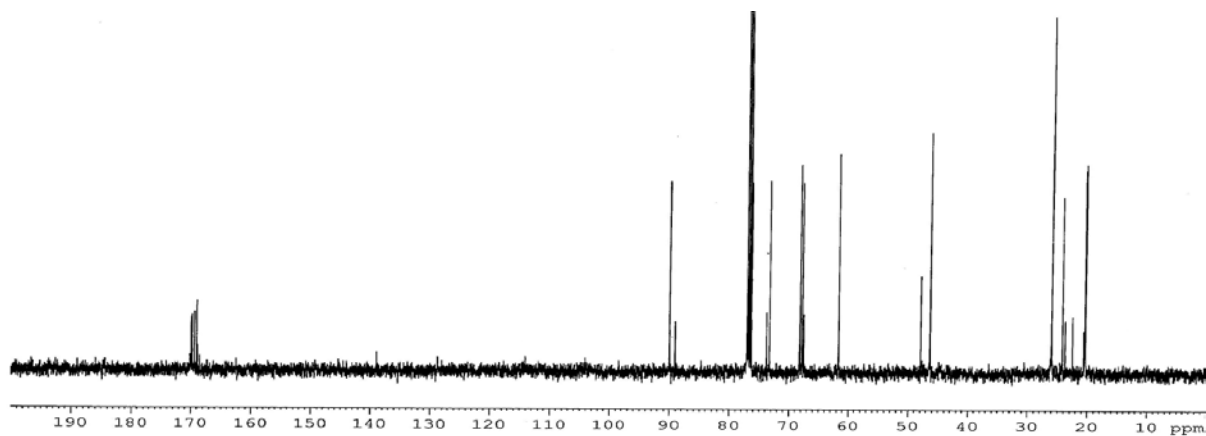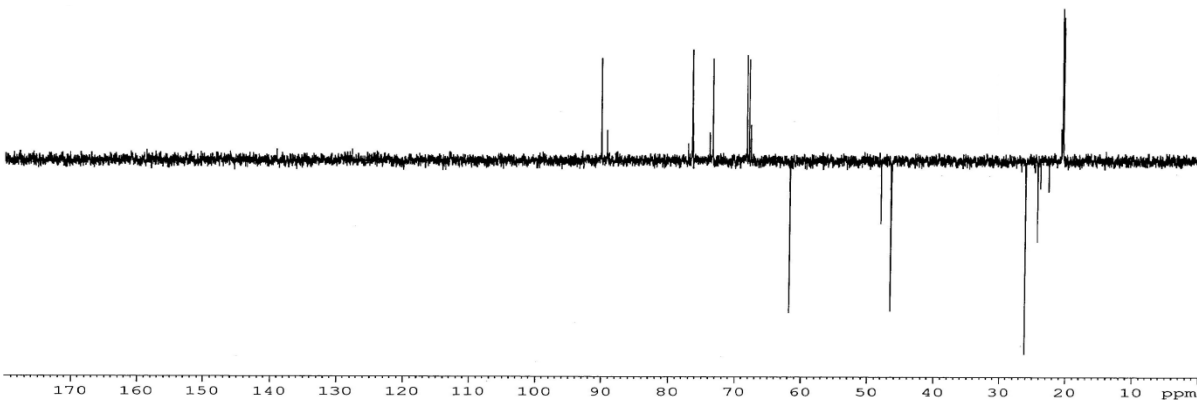

$^1\text{H}$  and  $^{13}\text{C}$  NMR spectra of compound **22** ( $\text{CDCl}_3$ ).

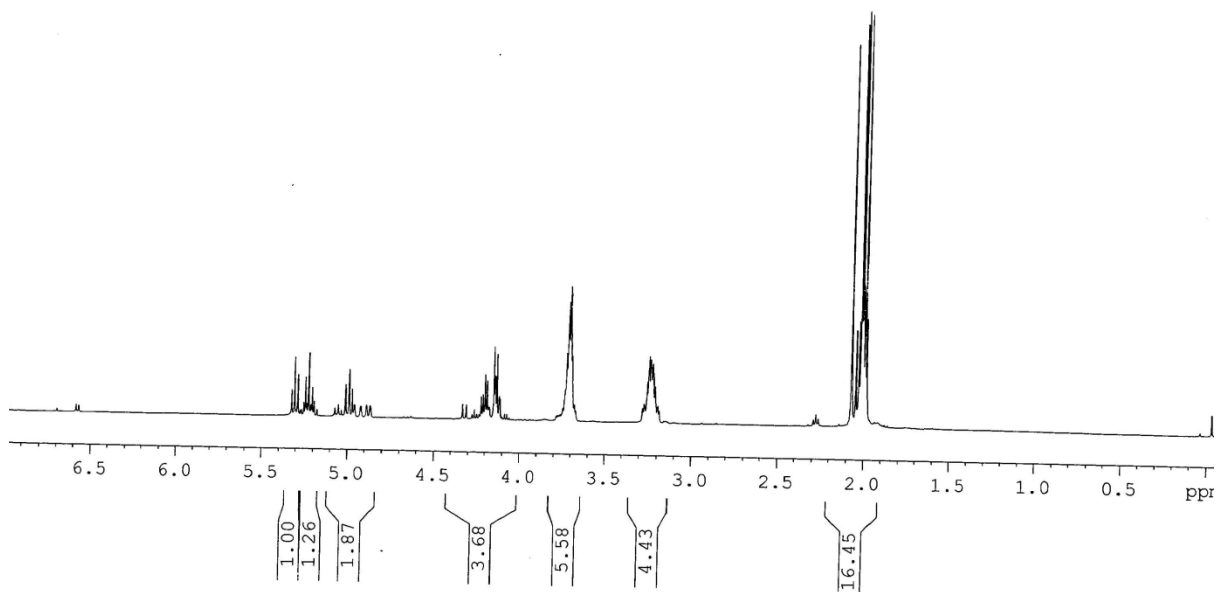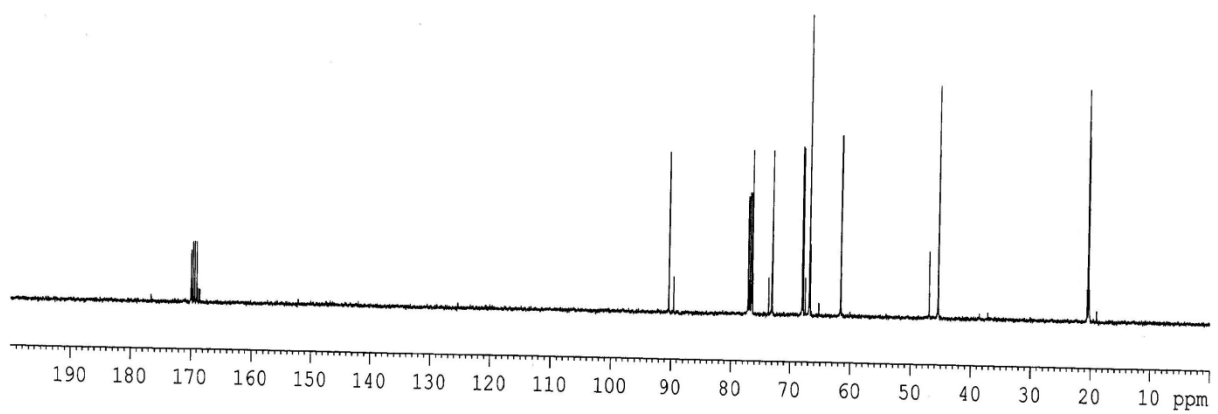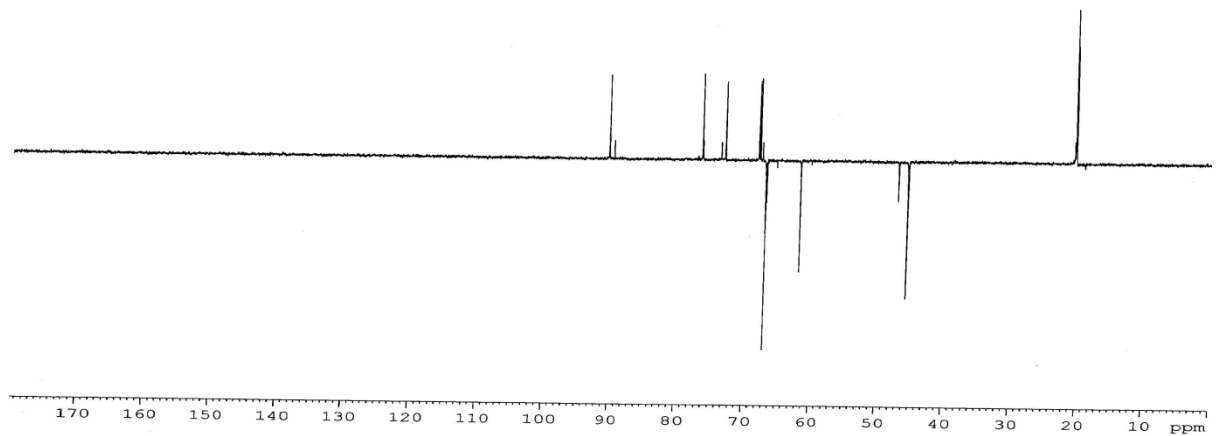

$^1\text{H}$  and  $^{13}\text{C}$  NMR spectra of compound **23** ( $\text{CDCl}_3$ ).

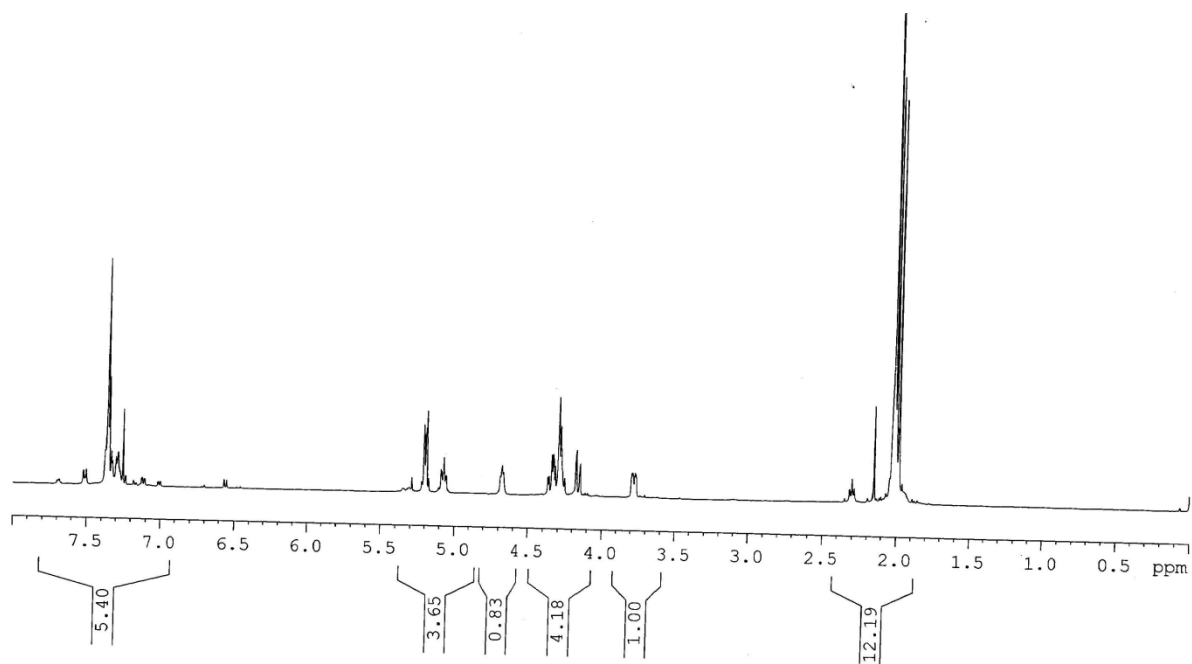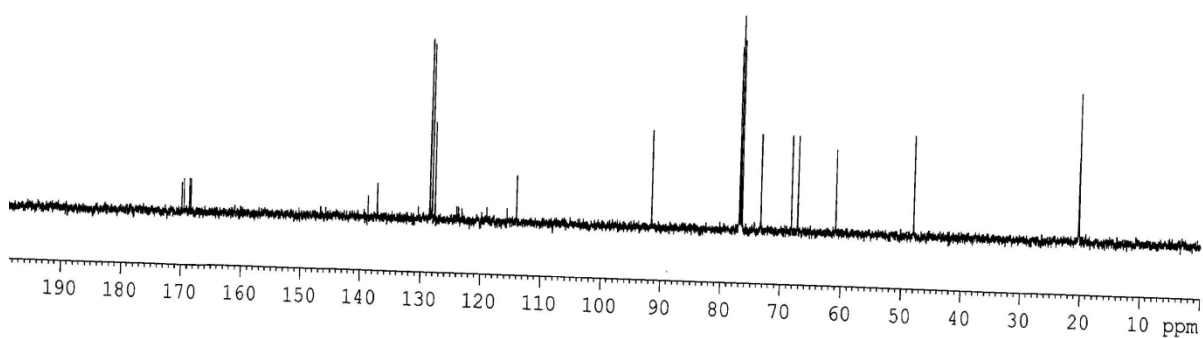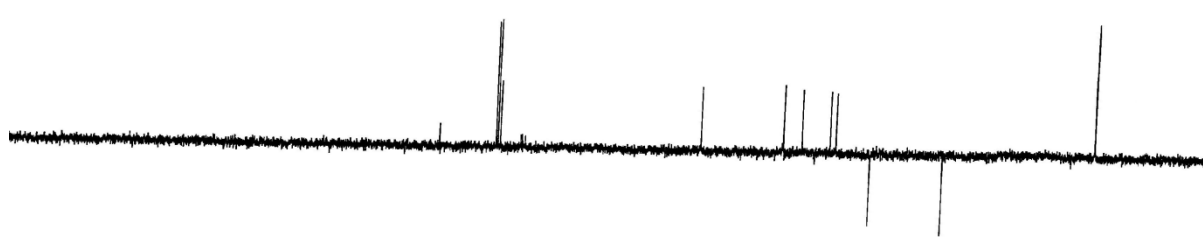

$^1\text{H}$  and  $^{13}\text{C}$  NMR spectra of compound **24** ( $\text{CDCl}_3$ ).

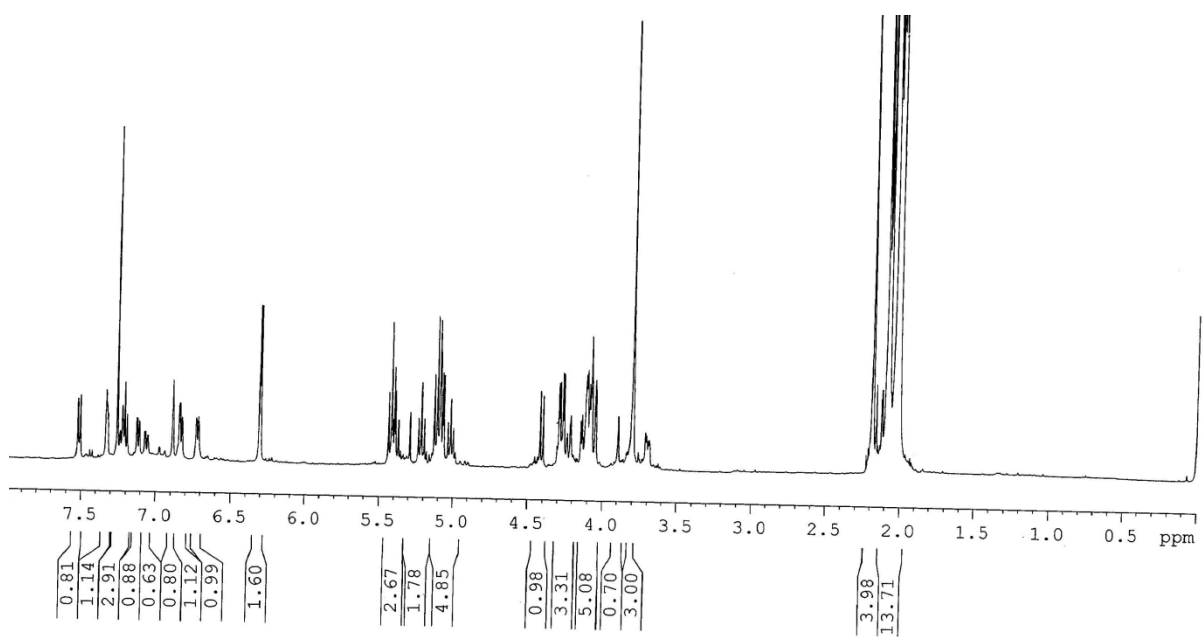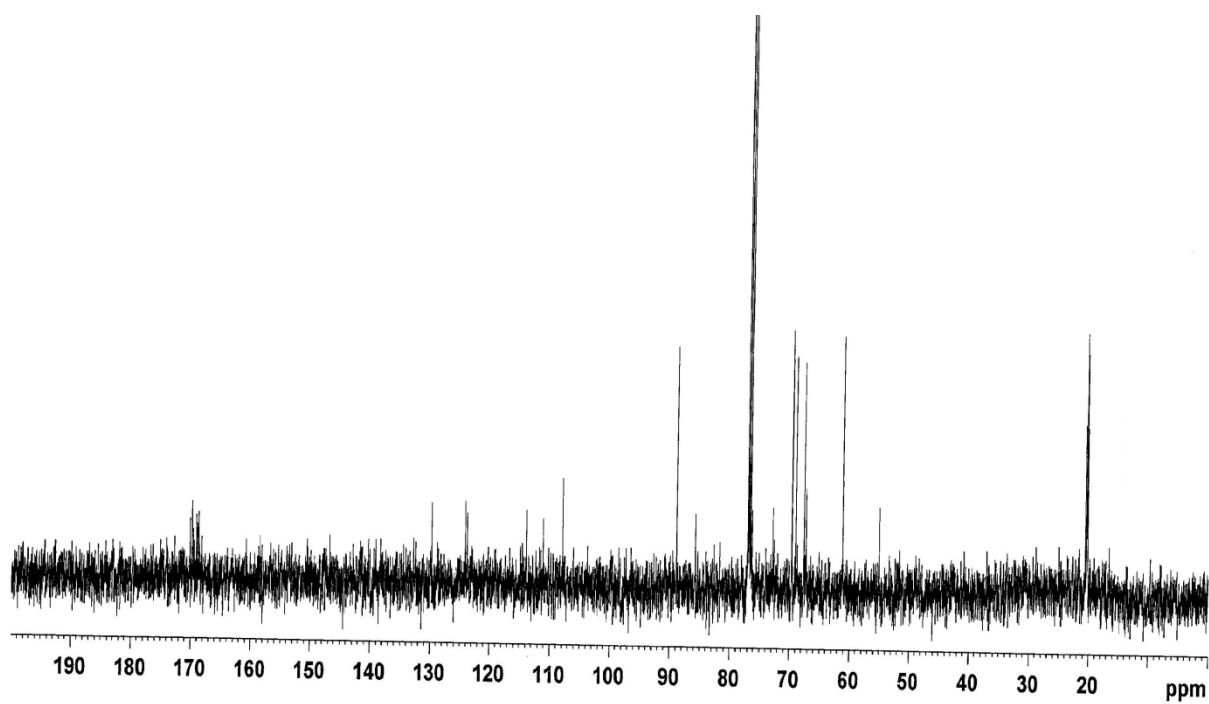

$^1\text{H}$  and  $^{13}\text{C}$  NMR spectra of compound **25** ( $\text{CDCl}_3$ ).

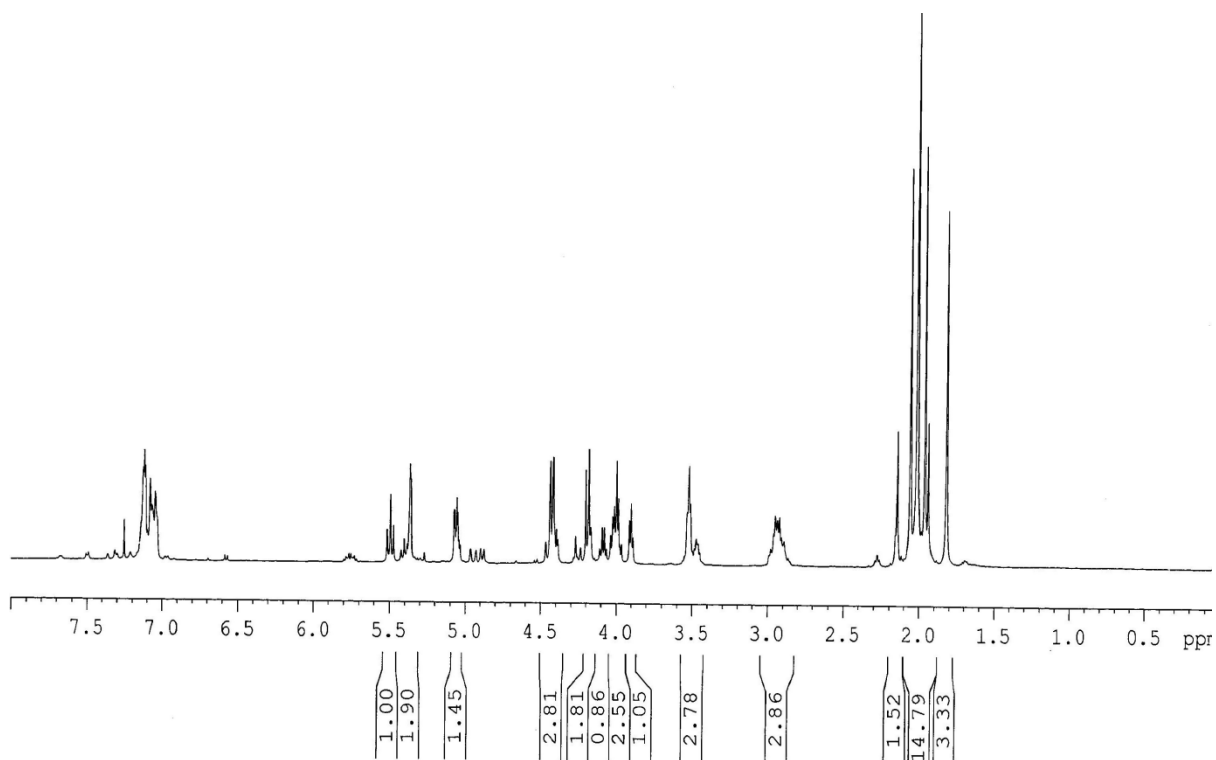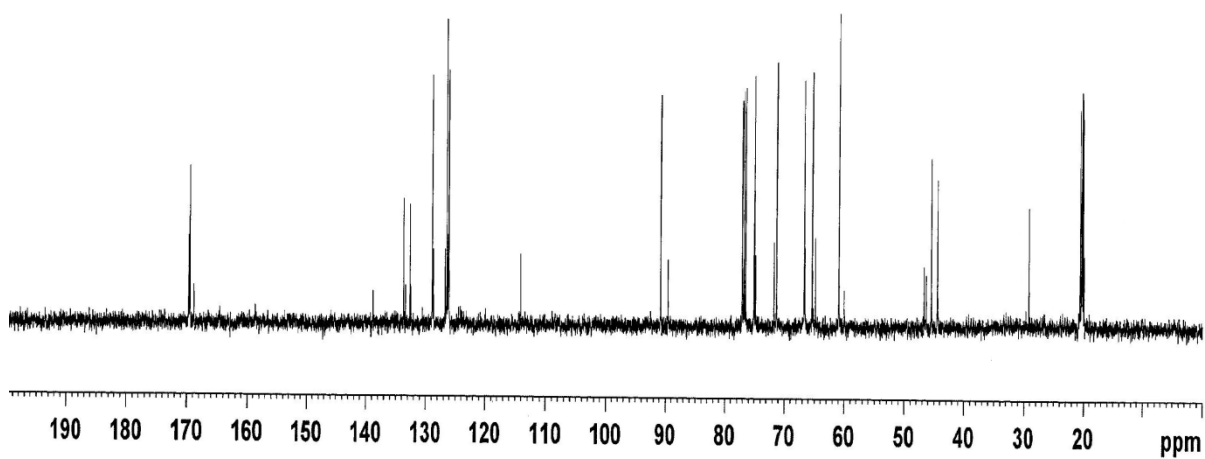

$^1\text{H}$  and  $^{13}\text{C}$  NMR spectra of compound **26** ( $\text{CDCl}_3$ ).

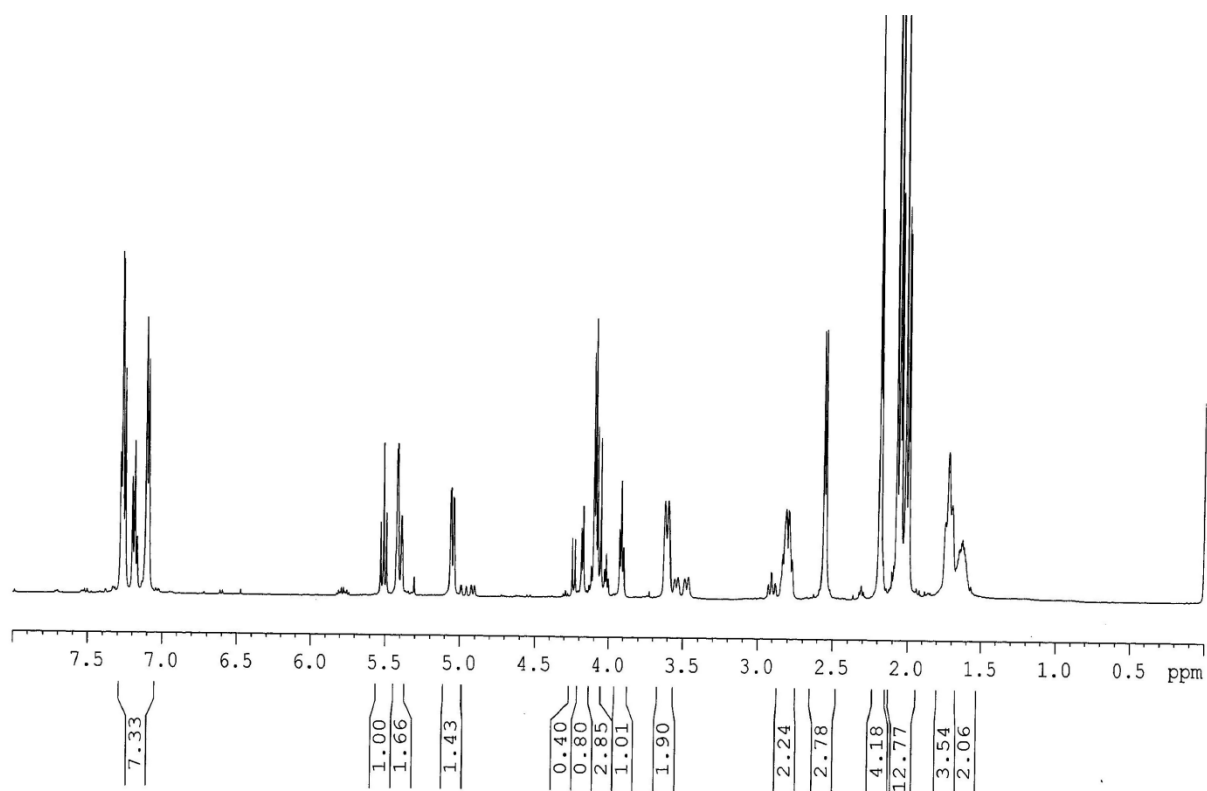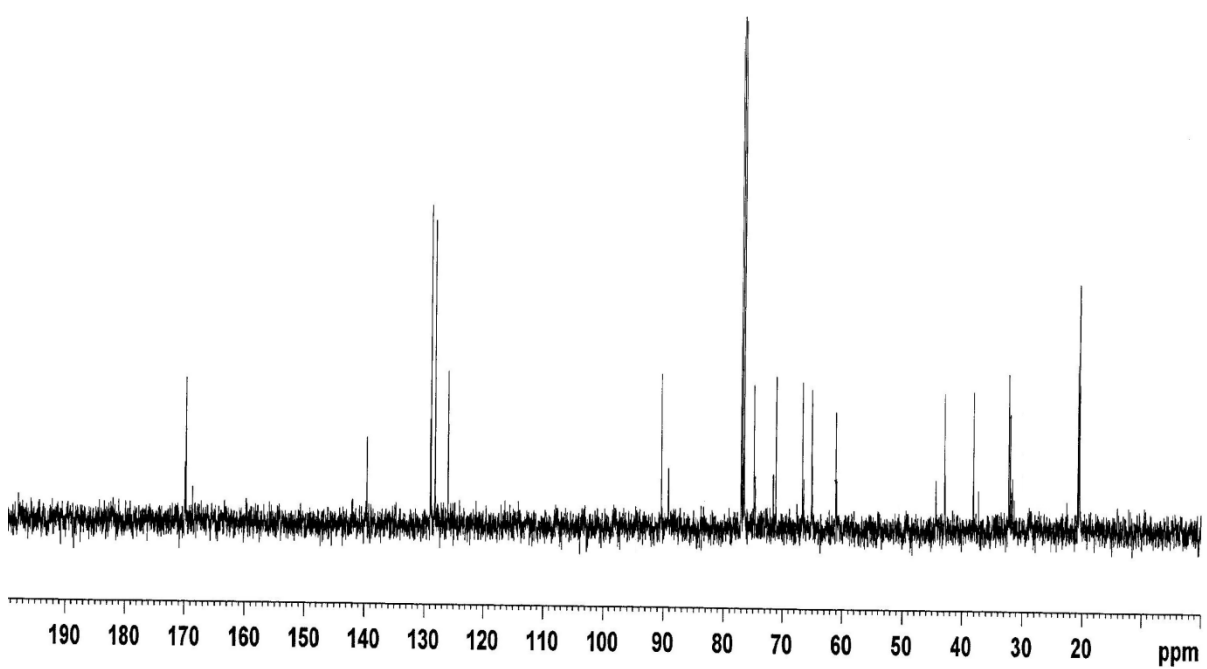

$^1\text{H}$  and  $^{13}\text{C}$  NMR spectra of compound **27** ( $\text{CDCl}_3$ ).



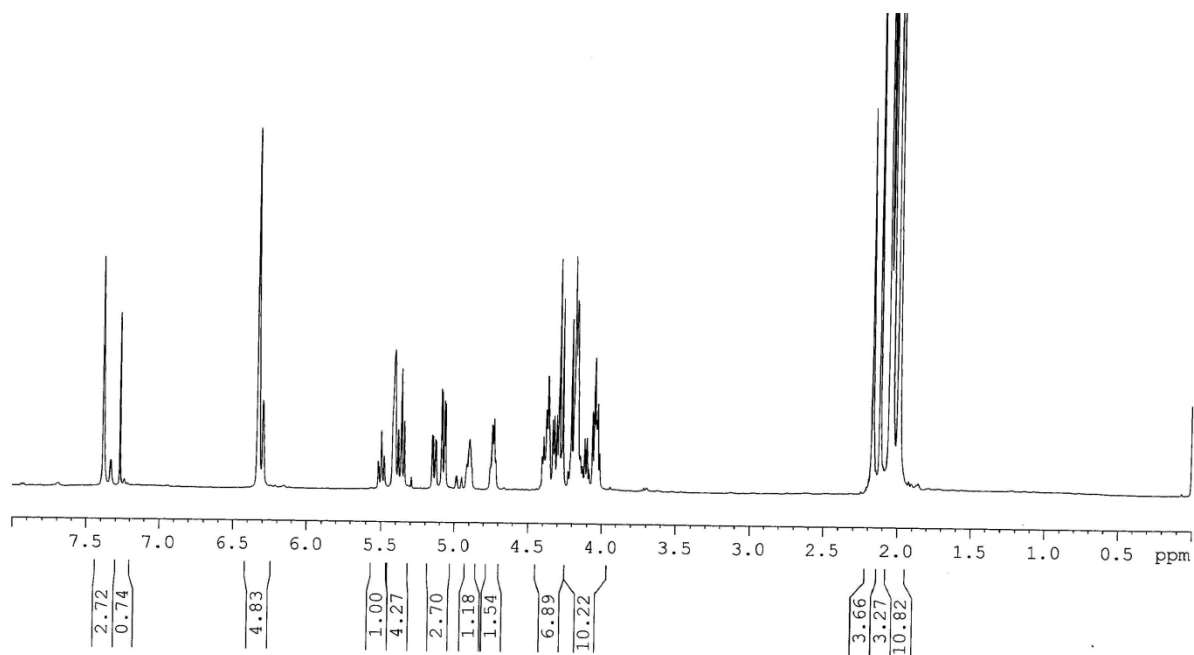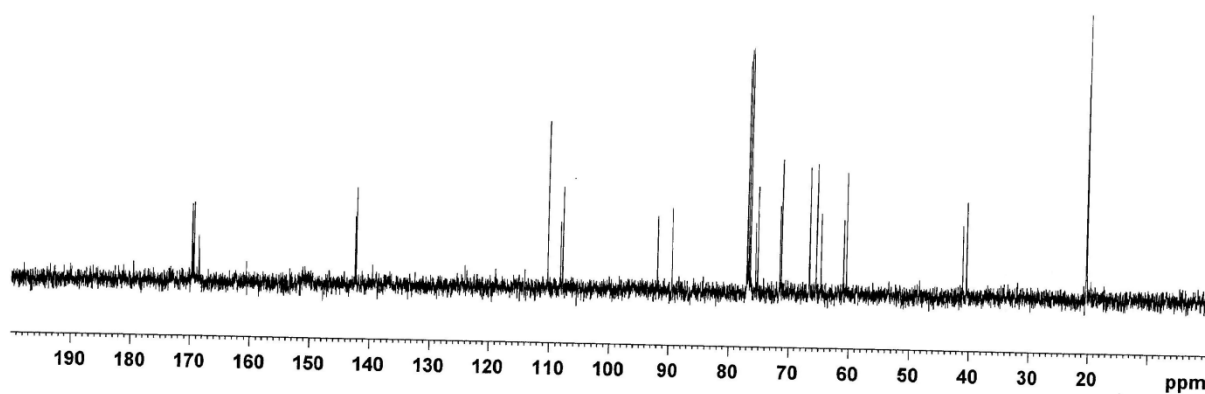

$^1\text{H}$  and  $^{13}\text{C}$  NMR spectra of compound **28** ( $\text{CDCl}_3$ ).

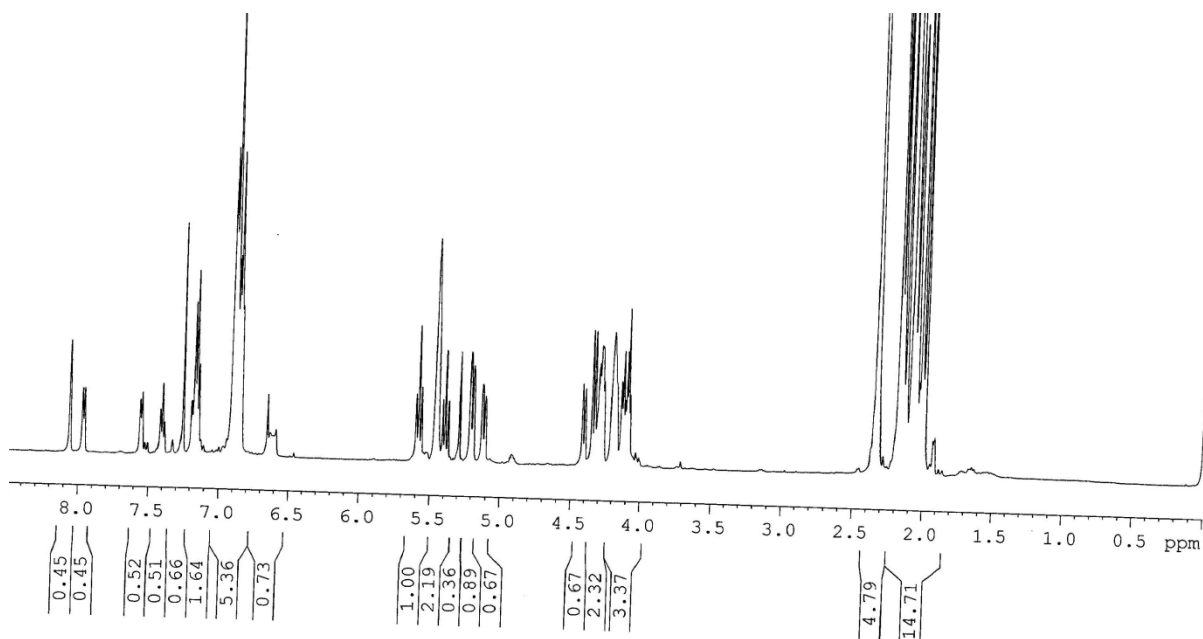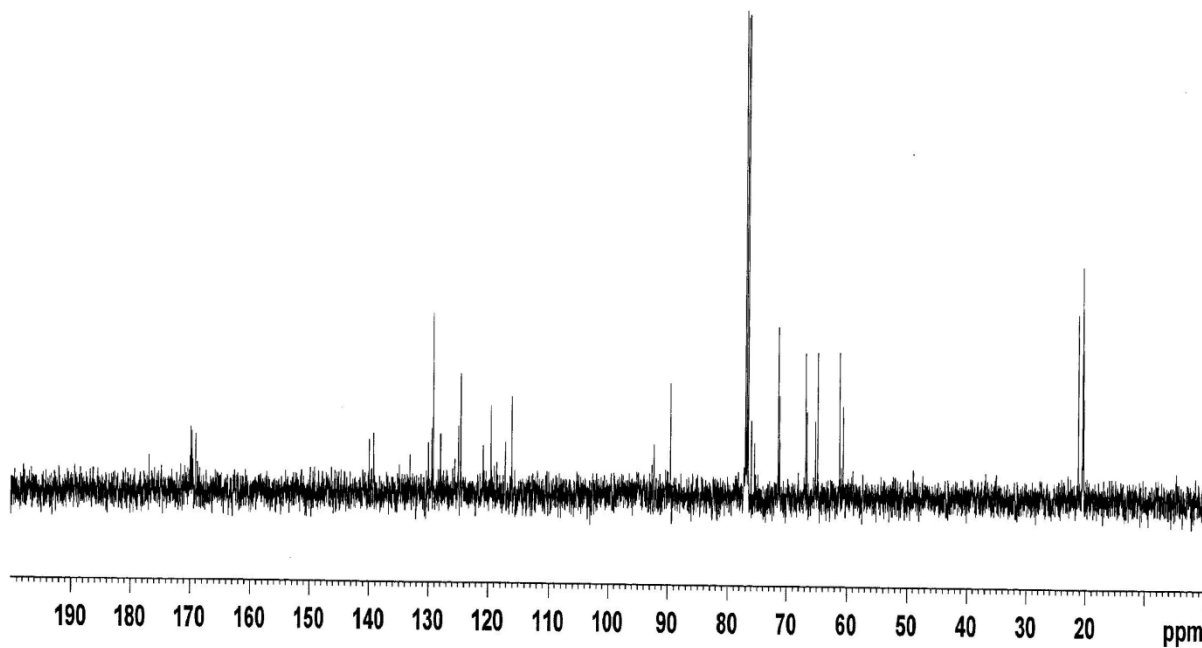

$^1\text{H}$  and  $^{13}\text{C}$  NMR spectra of compound **29** ( $\text{CDCl}_3$ ).

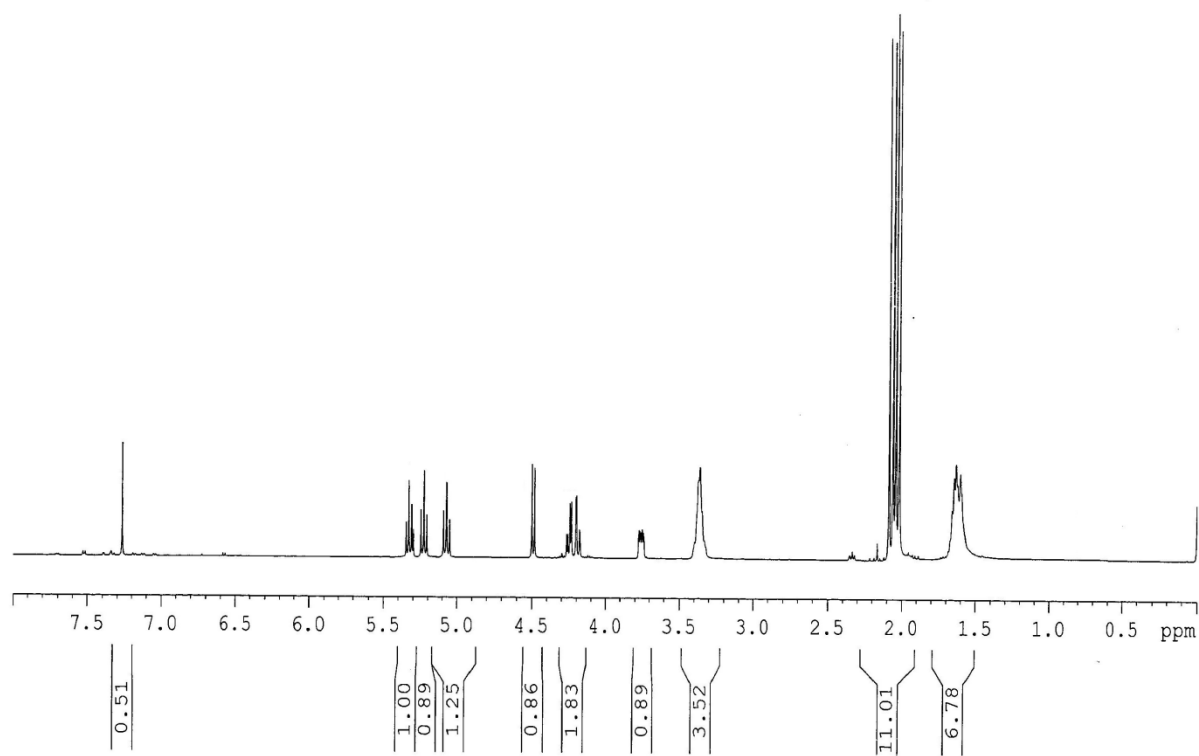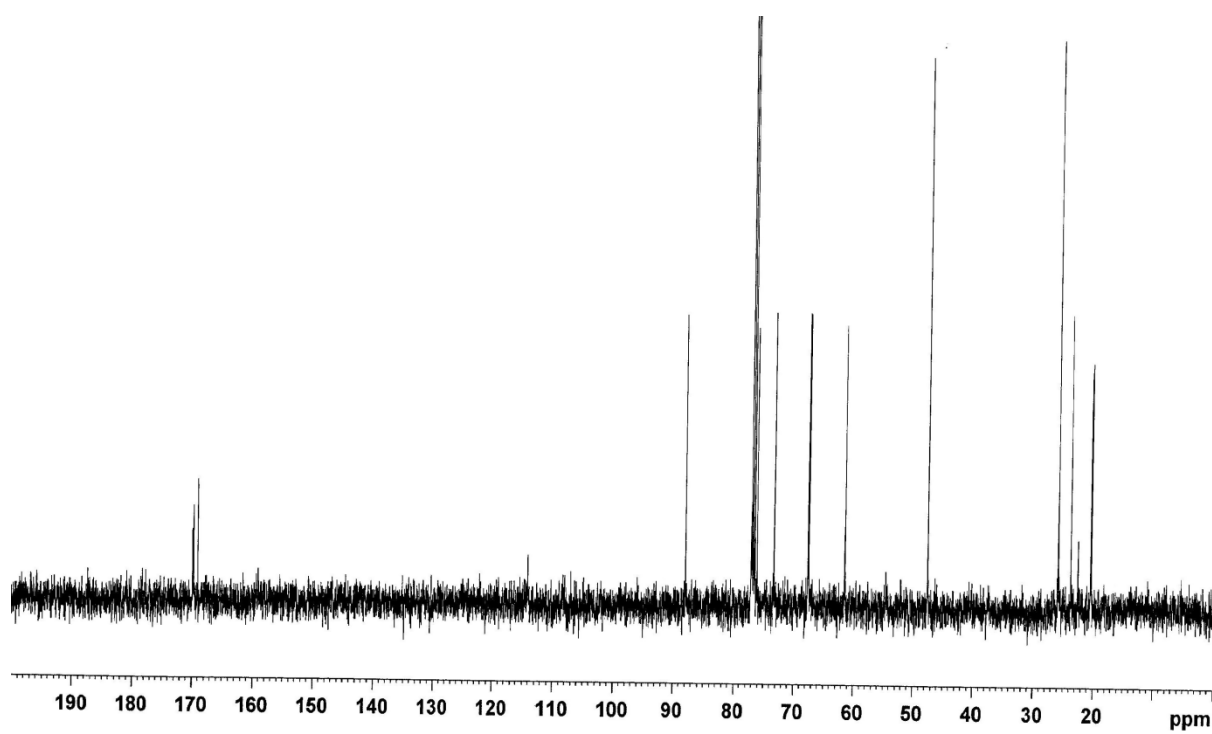

$^1\text{H}$  and  $^{13}\text{C}$  NMR spectra of compound **30** ( $\text{CDCl}_3$ ).

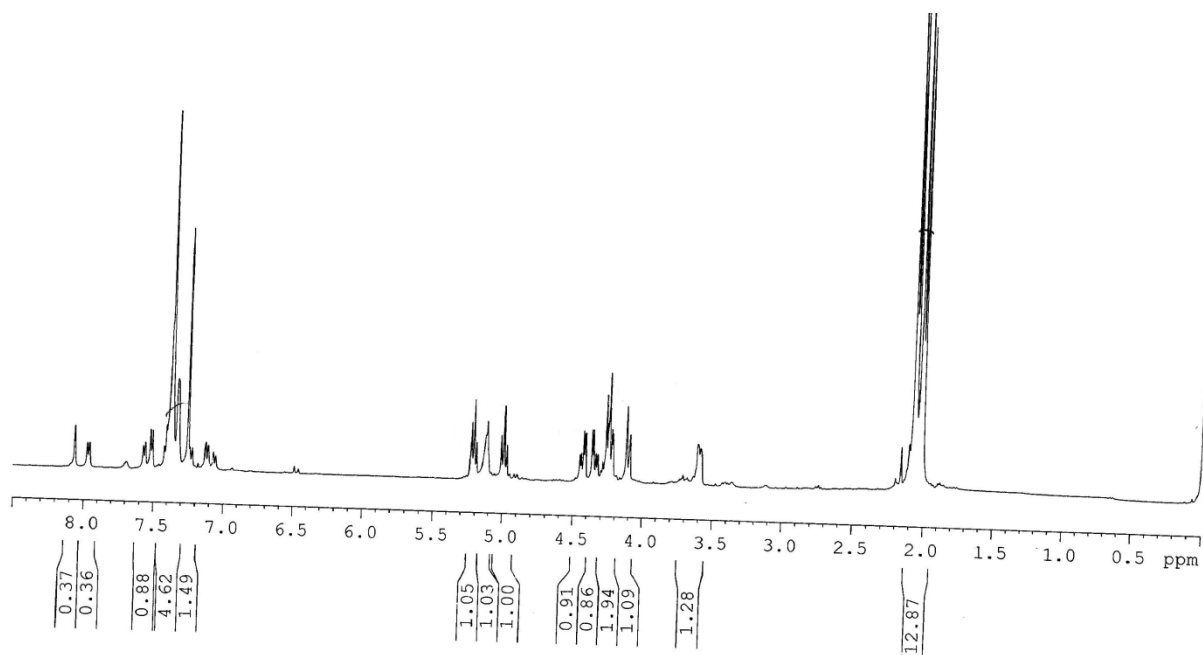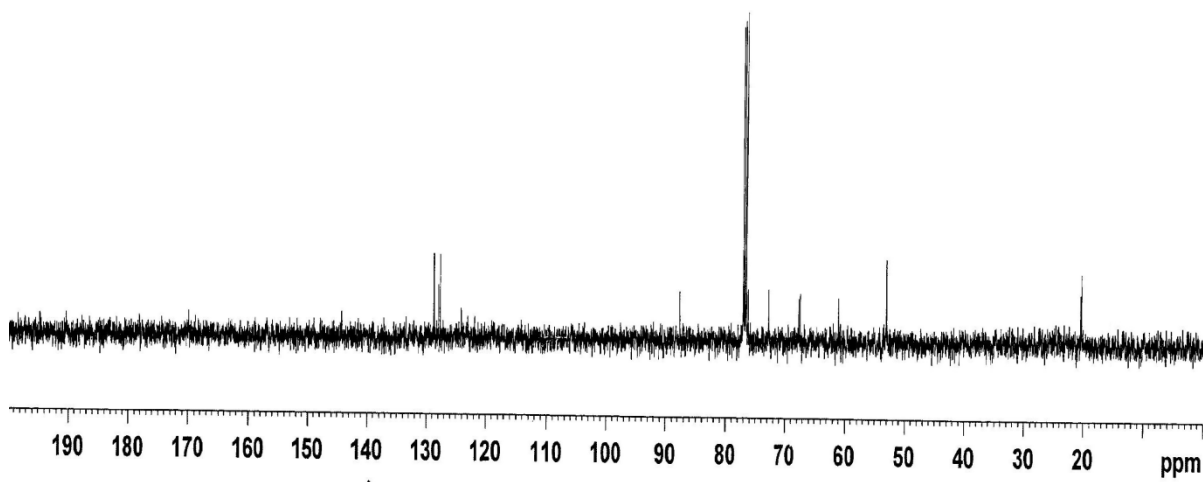

$^1\text{H}$  and  $^{13}\text{C}$  NMR spectra of compound **31** ( $\text{CDCl}_3$ ).

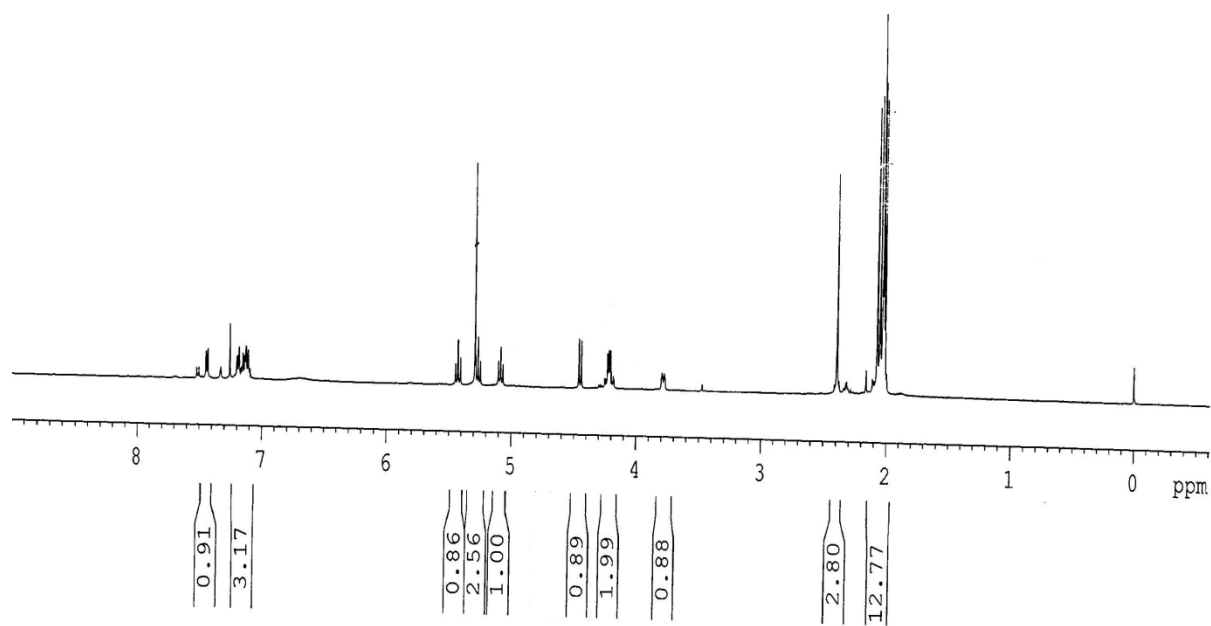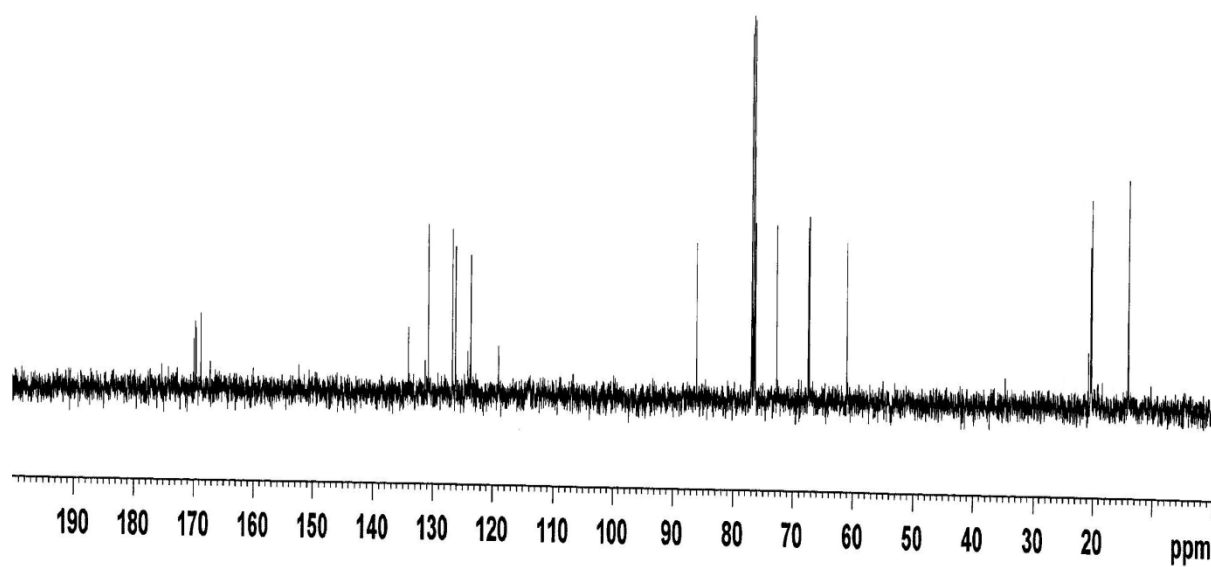

$^1\text{H}$  and  $^{13}\text{C}$  NMR spectra of compound **32** ( $\text{CDCl}_3$ ).

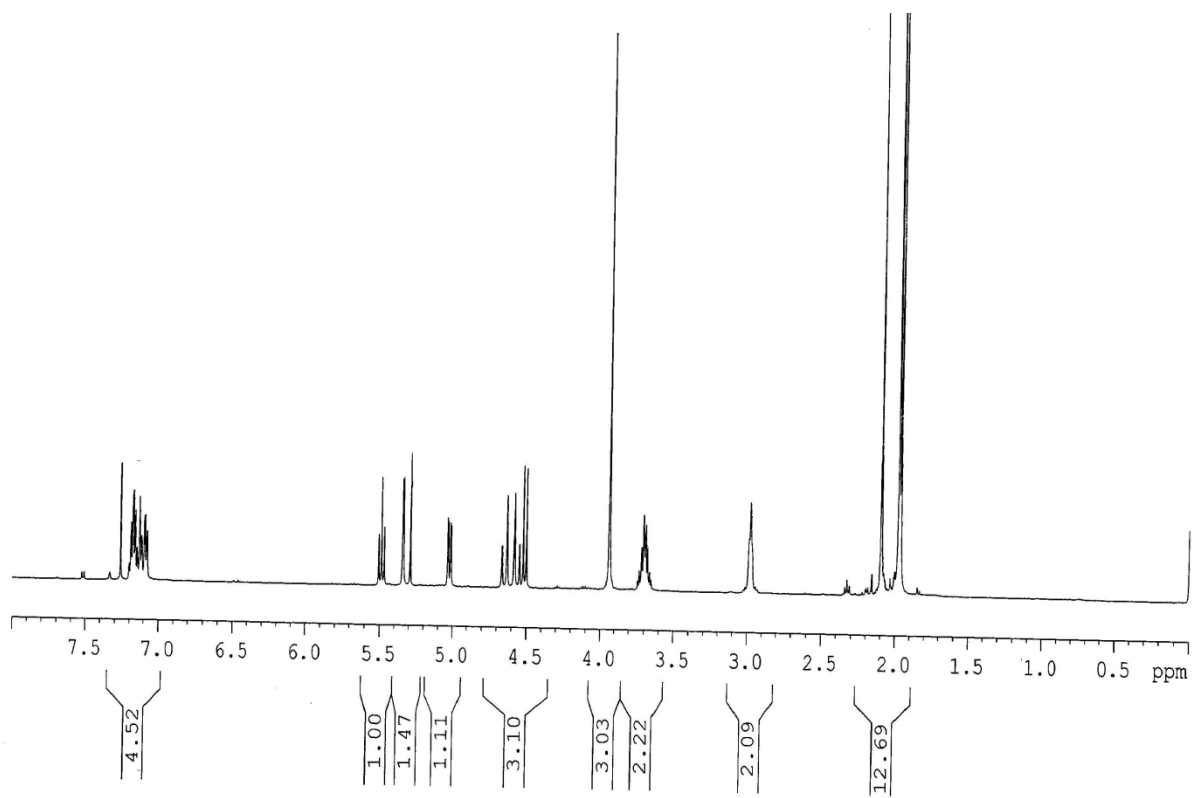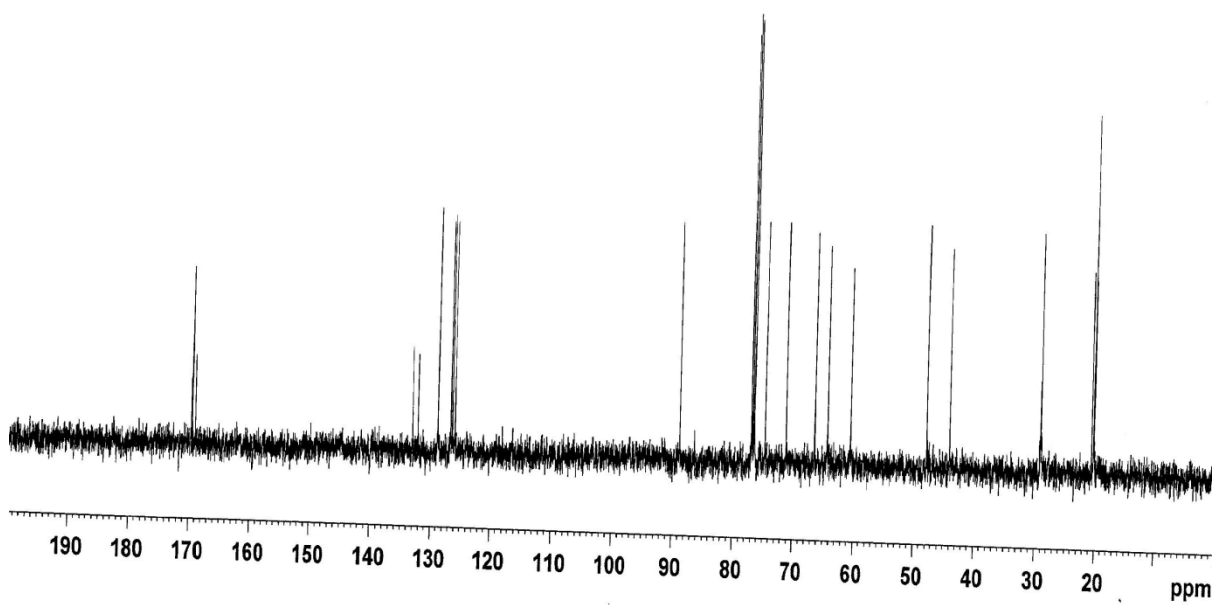

$^1\text{H}$  and  $^{13}\text{C}$  NMR spectra of compound **33** ( $\text{CDCl}_3$ ).

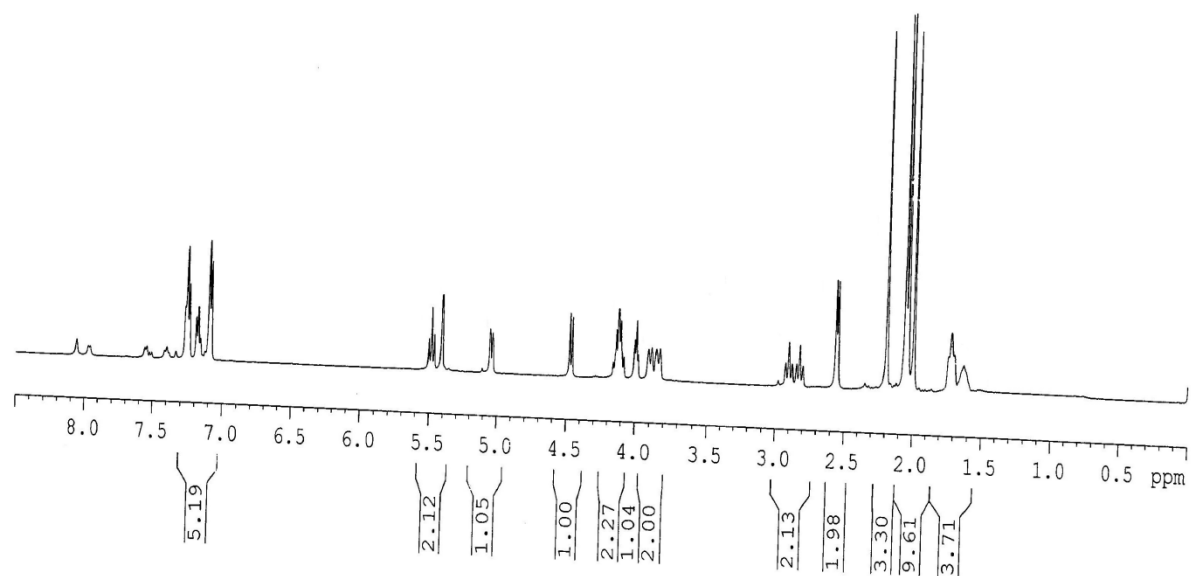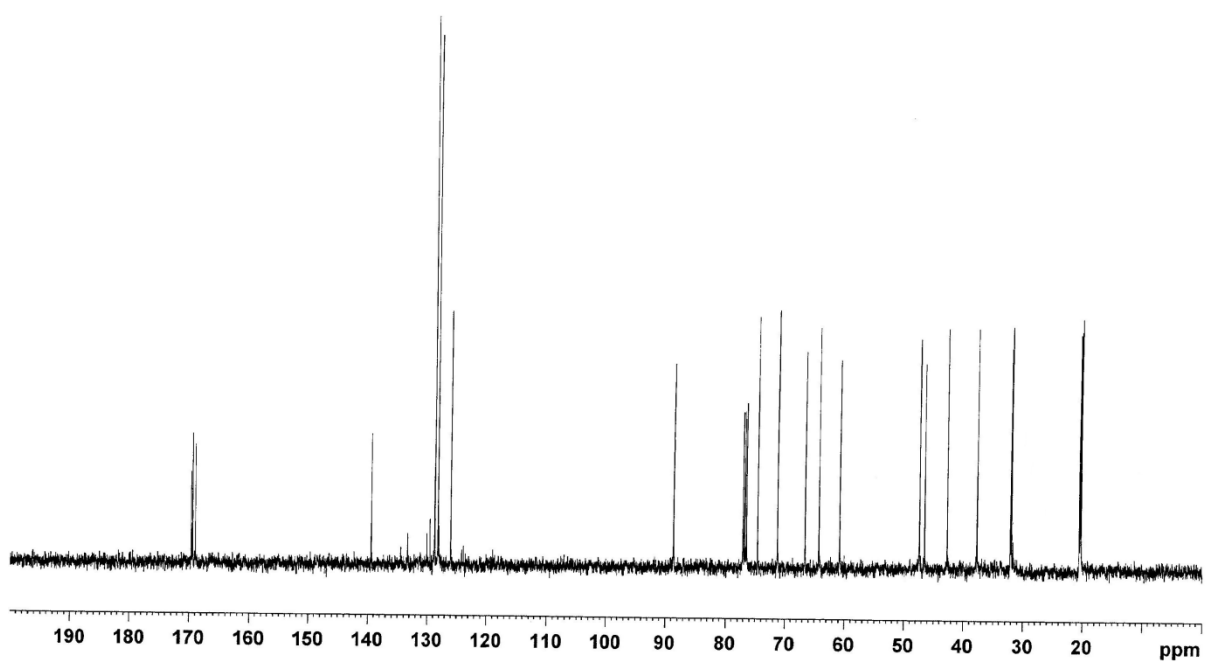

$^1\text{H}$  and  $^{13}\text{C}$  NMR spectra of compound **34** ( $\text{CDCl}_3$ ).

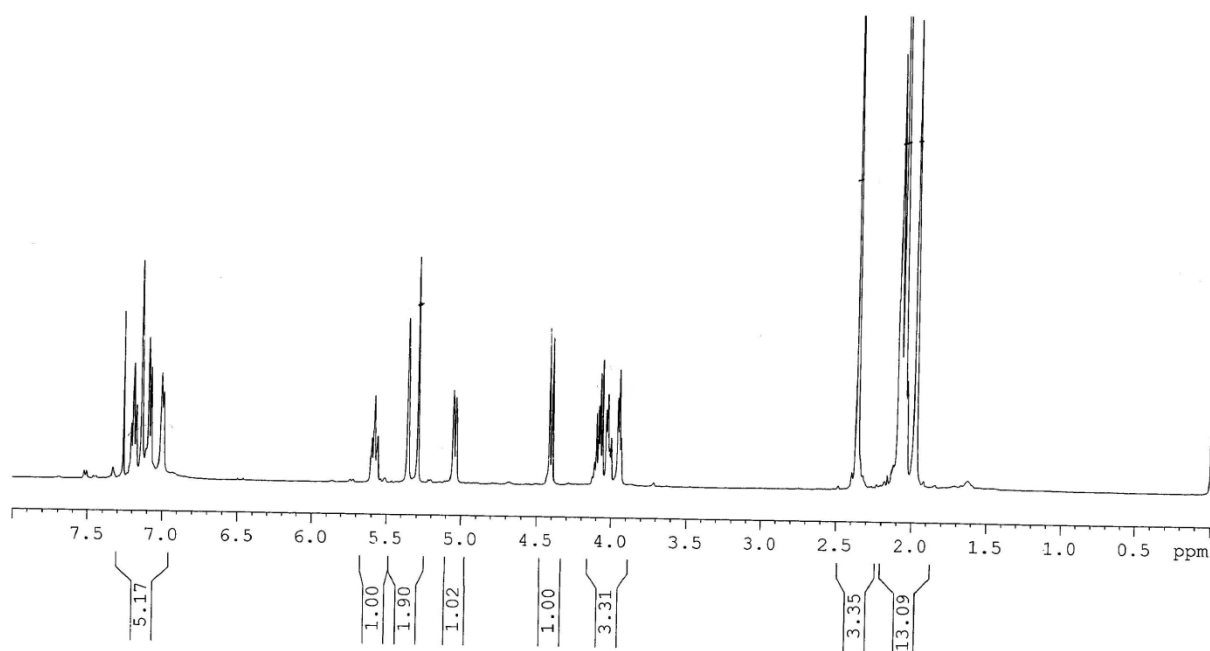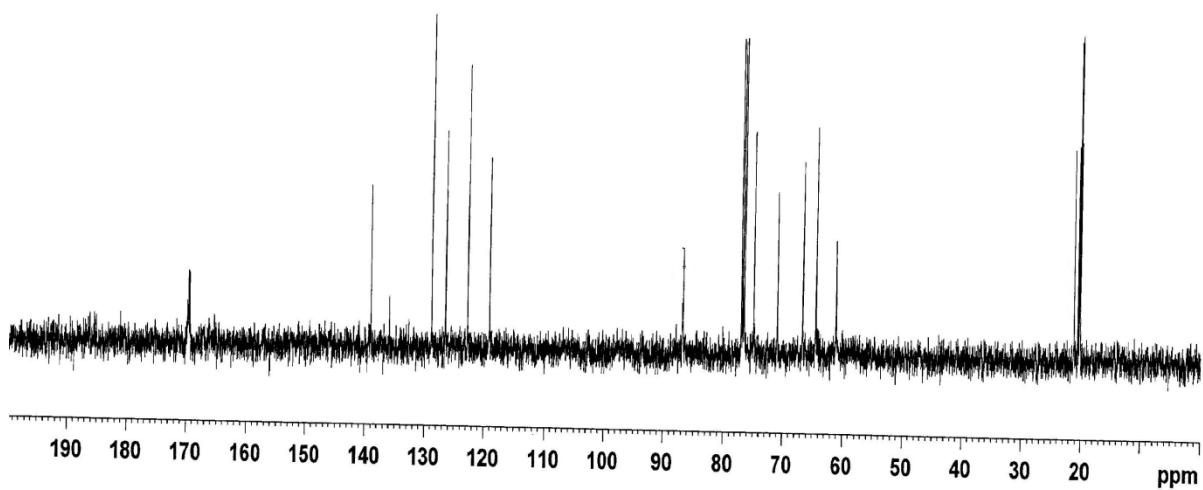

$^1\text{H}$  and  $^{13}\text{C}$  NMR spectra of compound **35** ( $\text{CDCl}_3$ ).
